# Supplementary material for: Progress and Status of Hydrometallurgical and Direct Recycling of Li-Ion Batteries and Beyond
Source: PubMed Central journal article supplement (PMC7040742; doi:10.3390/ma13030801), 2020-02-10
Supplement: materials-13-00801-s001.pdf [file materials-13-00801-s001.pdf]

# Progress and Status of Hydrometallurgical and Direct Recycling of Li-Ion Batteries and Beyond

François Larouche <sup>1,2</sup>, Farouk Tedjar <sup>3</sup>, Kamyab Amouzegar <sup>1</sup>, Georges Houlachi <sup>4</sup>, Patrick Bouchard <sup>1</sup>, George P. Demopoulos <sup>2,\*</sup> and Karim Zaghbi <sup>1,\*</sup>

<sup>1</sup> Center of Excellence in Transportation Electrification and Energy Storage (CETEES), Hydro-Québec, 1806, Lionel-Boulet Blvd., Varennes, QC J3X 1S1, Canada; larouche.francois3@hydro.qc.ca (F.L.); amouzegar.kamyab@hydro.qc.ca (K.A.); bouchard.patrick@ireq.ca (P.B.)

<sup>2</sup> Mining and Materials Engineering, McGill University, 3610 University Street, Montréal, QC H3A 0C5, Canada

<sup>3</sup> Energy Research Institute, NTU, 1 Cleantech loop, Singapore 634672; farouk.tedjar@ntu.edu.sg

<sup>4</sup> Centre de Recherche d'Hydro-Québec (CRHQ), 600, avenue de la Montagne, Shawinigan, QC G9N 7N5, Canada; houlachi.georges@ireq.ca

\* Correspondence: george.demopoulos@mcgill.ca (G.P.D.); zaghbi.karim@hydro.qc.ca (K.Z.)

Received: 21 December 2019; Accepted: 4 February 2020; Published: date

This supporting document provides master summary tables (Tables S1–S11 in Appendix) presenting information about processes discussed in the paper. The data provided for each publication reflect optimal process conditions and the process adopted by the authors. The data are grouped by the type of leaching agent, with a specific table dedicated for direct recycling. For each leaching agent, one table presents information about pretreatment and the leaching step and another table refers to subsequent purification steps. All studies may not be found in both tables because some may have focused mainly on optimizing the leaching step while others may have focused on optimizing the post-leaching process. In such a case, only the most relevant information provided with enough detail on test work methodologies is summarized in the tables.

Below are some table specific guidelines to read them.

## Leaching conditions summary table

### *Column 1: Reference*

The numbers listed in this column correspond to reference numbers in the Bibliography section of the paper.

### *Column 2: Pretreatment*

This column describes the pretreatment steps applied to spent batteries to prepare the cathodic active material prior to leaching. The process for treating the anodic active material when it is distinct from the recovery method of cathodic material is not considered in the table. The steps are chronological, starting from spent cells down to the leach feed material. Any separation step involves generation of waste or by-product, for which the post-treatment is not described therein. For instance, for “manual separation,” it is understood that the components of the battery are sorted out while leaving only the cathode for further steps. In several cases, the cathode has been submitted to alkaline leaching during which the aluminum foil is dissolved in caustic solution.

### *Column 3: Treated battery types*

This column lists the chemistry of the LIB being treated by the process.

### *Column 4: Leach feed*

This column lists the nature of the leach feed. It is the valuable product resulting from pretreatment. The term 'active material' refers only to the lithium-ion intercalation compounds, such as  $\text{LiFePO}_4$ . The term 'black mass' refers to the cathodic active layer coated on the current collector foil. It includes the lithium-ion intercalation compounds, conductive compound, and binder (most frequently PVDF). When both anode and cathode are leached together, it is specified in the cell. Otherwise, the leaching process described therein focuses only on cathodic valuable material. The terms 'cathode' and 'anode' denote the whole electrode, including the current collector. During pretreatment, the electrode might have been calcined at a high temperature, resulting in oxidized active material liberated from carbon and PVDF binder. Finally, some authors performed leaching tests using only fresh active material, which is specified in this column.

*Column 5: Reducing or oxidizing agent*

This column lists the reducing (R) or oxidizing (O) agent used in the leaching step. When no such agent is used, the term "None" is written.

*Column 6: Special leaching conditions*

This lists any special leaching condition(s) other than temperature, chemical concentration, leaching time, or solid-to-liquid ratio. The condition may be related to auxiliary equipment that accelerates the leaching reaction such as ultrasonic or electrochemically supported leaching. It can also be a detail regarding the leaching or reagent used.

*Column 7: Acid concentration*

This column lists the optimal concentration of acid. For consistency and ease of comparison, calculations have been reworked in some cases to express the units in mole per liter (M) for all studies.

*Column 8: Reducer/oxidizer concentration*

This column lists the optimal concentration of reducing or oxidizing agent. For consistency and ease of comparison, calculations have been reworked in some cases to express the units in mole per liter (M) for all studies.

*Column 9: Temperature*

This column lists the optimal reaction temperature in degree Celsius ( $^{\circ}\text{C}$ ).

*Column 10: Leaching time*

This column lists the reaction time in minutes (min). The reaction time is not necessarily the optimal one, but it corresponds to the time stated in the publication to reach the maximum recovery rate under the conditions specified herein.

*Column 11: Solid concentration*

This column lists the optimal solid concentration. The solid corresponds to the leach feed listed in Column 4. When the authors used different units, the solid concentration was back calculated from data provided in the publication. For consistency and ease of comparison, calculations have been reworked in some cases to express the units in gram per liter (g/L) of solute for all studies.

*Column 12: Leaching rate (%)*

This column lists the leaching yield for major elements. The values have been either taken directly from the studies or calculated based on the data therein.

**Purification processes summary table**

*Column 1: Reference*

The numbers listed in this column correspond to reference numbers in the Bibliography section of the paper.

*Column 2: Purification process (Reagents)*

This column lists the sequence of purification steps. The reagent used is enclosed within brackets.

*Column 3: Final product(s)*

This column lists each product and tails, unless gaseous emission is coming from combustion.

*Column 4: Recovery rate (%)*

This column lists the recovery of major components wherever available. It refers to the elemental recovery through the entire purification process toward valuable products. The values have been either taken directly from the studies or calculated based on the data therein.

*Column 5: Comments*

This column lists additional details on the process described. More specifically, when the LIB active material is one of the end products of the process, a summary of electrochemical capacity tests is given. This information has been either culled out from Results and Discussion sections of the publication or derived from data therein.

**Summary tables for direct recycling processes***Column 1: Reference*

The numbers listed in this column correspond to reference numbers in the Bibliography section of the paper.

*Column 2: Treated battery type(s)*

This column lists the chemistry/chemistries of LIB(s) treated by the process.

*Column 3: Process steps*

This column lists the process steps in a chronological order. For each step, the reagent used is given in brackets.

*Column 4: Temperature (°C)/other parameter*

This column lists the main process parameter for each process step given in Column 3. The parameter is vertically aligned with the corresponding process step specified in Column 3.

*Column 5: Final products*

In this column, a list of products and their states, including waste, is given. The gaseous waste from combustion is excluded from the list.

*Column 6: Re-evaluated capacity (mAh/g)*

Direct recycling aims to transform waste lithium-ion waste active material into new one. In this regard, most studies provide a comparative evaluation of electrochemical properties of the final product. The results of this analysis are shown in Column 6. To allow comparison between each process, results from standard electrochemical test conditions were given priority over others. These conditions are the following: Initial specific capacity at C/10, initial specific capacity at 1 C, and

capacity retention at 1 C. However, given the heterogeneity of electrochemical characterization methods among all studies considered herein, this principle could not be respected all the time.

## Appendix

**Table S1.** Summary of leaching processes with sulfuric acid; here, LCO, NCO, NCA, NMC, LMO, and LFP-C are lithium-cobalt oxide, lithium-nickel-cobalt oxide, lithium-nickel-aluminum oxide, lithium-nickel-manganese-cobalt, lithium-manganese-oxide, and lithium-iron-phosphate-carbon, respectively; N.A. stands for “Not Applicable”; N.S. stands for “Not Specified”.

| Reference(s) | Pretreatment                                                                            | Treated Battery Type(s) | Leach feed                     | Reducing [R]/Oxidizing [O] Agent                  | Special Leaching Condition(s) | Acid Concentration (M) | Reducer/Oxidizer Concentration (M) | T (°C) | Leaching Time (min) | Solid Concentration (g/L) | Recovery Rate (%)                                | Pros                                            | Cons                      |
|--------------|-----------------------------------------------------------------------------------------|-------------------------|--------------------------------|---------------------------------------------------|-------------------------------|------------------------|------------------------------------|--------|---------------------|---------------------------|--------------------------------------------------|-------------------------------------------------|---------------------------|
| [160]        | Crushing/Sieving<br>Magnetic Separation<br>Densimetric Separation<br>Alkaline leaching  | LCO-<br>LMO-<br>NMC     | Anodic and Cathodic Black Mass | Iron [R]                                          |                               | 1                      | Ratio Steel/Black Mass = 0.15      | 80     | N.S.                | N.S.                      | N.S.                                             | Proven technology                               |                           |
| [145]        | N.S.                                                                                    | NMC                     | Black Mass                     | H <sub>2</sub> O <sub>2</sub> [R]                 |                               | 2                      | 30% Molar Excess                   | 55     | 150                 | 30–230                    | Li = 100%<br>Co = 100%<br>Ni = 100%<br>Al = 100% | High efficiencies                               | Long reaction time        |
| [132]        | Manual Separation                                                                       | LCO                     | Black Mass                     | H <sub>2</sub> O <sub>2</sub> [R]                 | 50 W Ultrasonic               | 2                      | 0.85                               | 60     | 120                 | 33                        | Li = 88%<br>Co = 96%                             | Low H <sub>2</sub> O <sub>2</sub> concentration | Low solid to liquid ratio |
| [136]        | Cryogenic Shredding<br>Magnetic Separation<br>Sieving<br>Density Separation<br>Grinding | NMC                     | Anode and Cathode              | Na <sub>2</sub> S <sub>2</sub> O <sub>5</sub> [R] |                               | 1.25                   | 0.1                                | 60     | 90                  | 1.5                       | Li = 95%<br>Co = 100%<br>Ni = 100%<br>Mn = 85%   | Low cost reducing agent                         | Low solid to liquid ratio |

|       |                                                                                                                                         |                     |                                |                                   |                      |            |      |      |     |                         |                                      |                                                       |                                                                                                              |
|-------|-----------------------------------------------------------------------------------------------------------------------------------------|---------------------|--------------------------------|-----------------------------------|----------------------|------------|------|------|-----|-------------------------|--------------------------------------|-------------------------------------------------------|--------------------------------------------------------------------------------------------------------------|
| [128] | Dismantling<br>Manual<br>Separation<br>Peeling Black<br>Mass<br>Calcining                                                               | LCO                 | Calcined<br>Active<br>Material | Sucrose or Glucose [R]            | 3                    | 0.86       | 95   | 120  | 25  | Li = 96%<br>Co = 98%    | Low cost<br>reducing<br>agent        | Low solid to<br>liquid ratio                          |                                                                                                              |
| [127] | Industrial Scale<br>Mechanical<br>Method<br>(Shredding,<br>Sieving &<br>Physical<br>Separation)                                         | LCO                 | Cathode +<br>Anode             | Glucose [R]                       | 2                    | 50% Excess | 90   | 180  | 100 | Li = 97%<br>Co = 98%    | Treatment of<br>cathode and<br>anode | Only<br>applicable to<br>LCO<br>Long reaction<br>time |                                                                                                              |
| [137] | Binder<br>Dissolution<br>(NMP)<br>Calcining (400 °C<br>for 2 h)                                                                         | LCO                 | Active<br>Material             | H <sub>2</sub> O <sub>2</sub> [R] | 1.2                  | 0.59       | 80   | 90   | 50  | N.A.                    | -                                    | -                                                     |                                                                                                              |
| [72]  | Dismantling<br>Manual<br>Separation<br>Shredding<br>Drying (200 °C)<br>Alkaline<br>Leaching (5%<br>NaOH)<br>Thermal (700 °C<br>for 4 h) | Blend of<br>LIBs    | Calcined<br>Active<br>Material | H <sub>2</sub> O <sub>2</sub> [R] | 4                    | 4.26       | 85   | 120  | 100 | Li = 96%<br>Co =<br>95% | High solid to<br>liquid ratio        | Long reaction<br>time                                 |                                                                                                              |
| [130] | Water Shredding<br>Density<br>Separation<br>Sieving (30 mesh)<br>Drying<br>Calcining (500 °C<br>for 1 h)                                | NMC-<br>LCO-<br>LMO | Active<br>Material             | Electrolysis                      | 400 A/m <sup>2</sup> | 2          | N.A. | N.S. | 180 | 75                      | Co = 99%<br>Mn =<br>99%<br>Cu = 99%  | Process at<br>pilot stage                             | Long reaction<br>time<br>Low current<br>density<br>leading to<br>expensive<br>electrolysis<br>infrastructure |

|       |                                                                       |                           |                    |                                                                             |       |                                                                                           |                    |      |       |                                                                          |                               |                                                       |
|-------|-----------------------------------------------------------------------|---------------------------|--------------------|-----------------------------------------------------------------------------|-------|-------------------------------------------------------------------------------------------|--------------------|------|-------|--------------------------------------------------------------------------|-------------------------------|-------------------------------------------------------|
| [138] | Crushing<br>Sieving<br>Magnetic<br>Separation<br>Crushing/<br>Sieving | LCO                       | Black Mass         | H <sub>2</sub> O <sub>2</sub> [R]                                           | 2     | 6.40                                                                                      | 75                 | 30   | 50    | Co =<br>100%<br>Li = 100%                                                | High<br>efficiencies          | Low solid to<br>liquid ratio                          |
| [158] | N.S.                                                                  | NMC<br>NCA                | Cathode            | SO <sub>2(g)</sub> [R]                                                      | 0.5–2 | Saturated                                                                                 | 25                 | 60   | 10–50 | Mass<br>Recovery<br>= 93%                                                | Low cost<br>reducing<br>agent | Low recovery<br>rate                                  |
| [161] | Thermal (500 °C)<br>Shredding<br>Sieving (12 mesh)                    | Li-ion<br>and Li<br>metal | Active<br>Material | H <sub>2</sub> O <sub>2</sub> [R]                                           | 0.5–2 | 2.13 – 4.26                                                                               | 50–80              | N.A. | 500   | N.A.                                                                     | -                             | -                                                     |
| [119] | Wet Shredding<br>Sieving (30 mesh)                                    | LCO<br>with<br>high Mn    | Black Mass         | No                                                                          | 2.8   | N.A.                                                                                      | 70–80              | 240  | 280   | Li = 100%<br>Co =<br>100%<br>Mn =<br>100%<br>Al = 61%<br>Cu = 23%        | No reducing<br>agent          | Long reaction<br>time                                 |
| [146] | Shredding                                                             | LCO<br>NMC<br>NCA         | Active<br>Material | SO <sub>2(g)</sub> [R] or Na <sub>2</sub> S <sub>2</sub> O <sub>5</sub> [R] | 2     | 0.67 M (Na <sub>2</sub> S <sub>2</sub> O <sub>5</sub> )<br>or Maintaining<br>ORP < 400 mV | 70<br>(exothermic) | 120  | 10    | Li = 92%<br>Co =<br>100%<br>Mn =<br>100%<br>Ni =<br>100%<br>Al =<br>100% | Low cost<br>reducing<br>agent | Long reaction<br>time<br>Low solid to<br>liquid ratio |
| [120] | Fresh Material                                                        | NMC                       | Active<br>Material | Cu <sup>0</sup> [R]                                                         | 1     | 1:1.2 Cu:Active<br>Material Ratio                                                         | 30                 | 180  | 40    | (Li, Mn,<br>Ni, Co) ><br>95%<br>Cu = 35%                                 | Low cost<br>reducing<br>agent | Long reaction<br>time<br>Low solid to<br>liquid ratio |

|       |                                                                                                                      |                   |                                     |                                                  |         |               |       |     |         |                                                 |                               |                                                       |
|-------|----------------------------------------------------------------------------------------------------------------------|-------------------|-------------------------------------|--------------------------------------------------|---------|---------------|-------|-----|---------|-------------------------------------------------|-------------------------------|-------------------------------------------------------|
| [147] | Dismantling<br>Crushing<br>Sieving<br>Alkaline leaching<br>Reducing<br>roasting<br>Water-CO <sub>2</sub><br>Leaching | NMC<br>LCO        | Calcined<br>Active<br>Material      | Lignite (in roasting) [R]                        | 3.5     | N.S.          | 85    | 180 | 200     | Li = 85%<br>Co = 99%<br>Mn =<br>99%<br>Ni = 99% | Low cost<br>reducing<br>agent | Complex<br>pretreatment<br>Long reaction<br>time      |
| [150] | Discharging<br>Dismantling<br>Calcining (600<br>°C)                                                                  | NMC               | Calcined<br>Active<br>Material      | H <sub>2</sub> O <sub>2</sub> [R]                | 4       | 2             | 90    | 120 | 25      | Co = 99%<br>Ni = 99%<br>Mn =<br>97%             | High<br>leaching rates        | Long reaction<br>time<br>Low solid to<br>liquid ratio |
| [79]  | Dismantling                                                                                                          | NMC<br>+NiMH      | Anode and<br>Cathode                | H <sub>2</sub> O <sub>2</sub> [R]                | 3       | 0.74          | N.S.  | 240 | N.S.    | N.S.                                            | -                             | -                                                     |
| [151] | Discharging<br>Dismantling<br>Alkaline<br>Leaching<br>(NaOH)                                                         | LCO               | Anode and<br>Cathodic Black<br>Mass | Cu foil [R]                                      | 3       | 1.25g Cu/g Co | 70    | 360 | 200     | Co = 98%<br>Li = 98%<br>Cu = 9%                 | Low cost<br>reducing<br>agent | Long reaction<br>time                                 |
| [154] | Discharging<br>Cryogenic<br>Dismantling                                                                              | LCO               | Cathode and<br>Anode                | No                                               | 1.5     | N.A.          | 80    | 60  | 20      | Co = 37%<br>Li = 55%                            | No reducing<br>agent          | Low leaching<br>rates                                 |
| [148] | Dismantling<br>Manual<br>separation<br>Electrodes<br>Shredding                                                       | LCO               | Cathode                             | H <sub>2</sub> O <sub>2</sub> [R]                | 0.4–1.5 | 0.43          | 20–80 | 60  | 100–200 | Al = 55%<br>Co = 80%<br>Li = 95%                | High solid to<br>liquid ratio | Low leaching<br>rates                                 |
| [73]  | Dismantling<br>Thermal (600 °C)                                                                                      | LCO<br>LMO<br>LCM | Black Mass                          | No                                               | 1       | N.A.          | 95    | 240 | 50      | Co = 66%<br>Li = 93%<br>Ni = 96%<br>Mn =<br>50% | No reducing<br>agent          | Low leaching<br>rates                                 |
| [135] | Crushing<br>Magnetic                                                                                                 | LCO<br>NMC<br>NCA | Cathode &<br>Anode                  | C <sub>6</sub> H <sub>8</sub> O <sub>6</sub> [R] | 2       | 0.03          | 80    | 300 | 50      | Co =<br>100%<br>Li = 95%                        | Low<br>reducing               | Long reaction<br>time                                 |



| Separation Sieving (1 mm) |                                                                |                               |                          |                                                   |                                                    |                                                                |                    |     |      | Ni = 105% | agent concentration                                    |                                                |                                                     |
|---------------------------|----------------------------------------------------------------|-------------------------------|--------------------------|---------------------------------------------------|----------------------------------------------------|----------------------------------------------------------------|--------------------|-----|------|-----------|--------------------------------------------------------|------------------------------------------------|-----------------------------------------------------|
| [139]                     | Discharge Dismantling Manual separation Acid roasting (300 °C) | LCO<br>NMC<br>LMO             | Black Mass               | No                                                | Acid Roasting                                      | 2 L/kg Solid                                                   | N.A.               | 300 | 30   |           | Co = 80%<br>Li = 79%                                   | High temperature acid roasting                 |                                                     |
|                           |                                                                |                               |                          |                                                   | Water Leaching                                     | N.A.                                                           | N.A.               | 75  | 60   | 250       |                                                        |                                                |                                                     |
|                           |                                                                |                               |                          | Glucose [R]                                       | 2nd Leaching                                       | 1 M H <sub>2</sub> SO <sub>4</sub> +<br>0.5 M HNO <sub>3</sub> | 0.11               | 50  | 45   | 100       | Cumul.<br>Co = 90%<br>Li = 93%<br>Ni = 83%<br>Mn = 78% | Low cost reducing agent                        | High temperature acid roasting                      |
| [149]                     | Thermal Treatment Crushing Sieving Alkaline Leaching (NaOH)    | NMC                           | Black Mass               | H <sub>2</sub> O <sub>2</sub> [R]                 |                                                    | 5                                                              | 4× Stoichiometric  | 90  | 120  | 125       | N.S.                                                   | -                                              | -                                                   |
| [140]                     | Discharging Dismantling Manual Separation Pyrolysis            | LCO                           | Calcined Active Material | H <sub>2</sub> O <sub>2</sub> [R]                 |                                                    | 2                                                              | 2.13               | 80  | 60   | 50        | Co = 99%<br>Li = 99%                                   | High efficiencies                              | High concentration of H <sub>2</sub> O <sub>2</sub> |
| [129]                     | Crushing/Sieving Drying                                        | LCO,<br>LNO &<br>Polymer LIBs | Black Mass               | No                                                |                                                    | 2                                                              | N.A.               | 60  | 90   | 20        | Co = 60%<br>Li = 100%                                  | No reducing agent<br>Treatment of polymer LIBs | Low leaching rates                                  |
| [134]                     | N.A.                                                           | NMC<br>LCO<br>LMO             | Fresh Active Material    | Na <sub>2</sub> S <sub>2</sub> O <sub>8</sub> [R] | Only Na <sub>2</sub> S <sub>2</sub> O <sub>8</sub> | N.A.                                                           | 0.33:1 R:NMC Ratio | 90  | 1440 | N.S.      | Li = 60%<br>Ni, Mn ,Co < 1%                            | Low cost reducing agent                        | Low leaching rates                                  |

|          |                                                                                                                                     |                          |                                               |                                         |                                  |      |                                                       |       |         |           |                                      |                               |                                                           |
|----------|-------------------------------------------------------------------------------------------------------------------------------------|--------------------------|-----------------------------------------------|-----------------------------------------|----------------------------------|------|-------------------------------------------------------|-------|---------|-----------|--------------------------------------|-------------------------------|-----------------------------------------------------------|
| [141]    | Crushing<br>Magnetic<br>Separation<br>Sieving                                                                                       | LCO                      | Cathode                                       | H <sub>2</sub> O <sub>2</sub> [R]       |                                  | 2    | 4.26                                                  | 75    | 75      | 50        | Co = 99%<br>Li = 99%                 | High<br>leaching rates        | Applicable<br>only to LCO                                 |
| [46]     | Inert Crushing<br>Physical<br>Separation<br>Sieving                                                                                 | LFP                      | Anodic and<br>Cathodic Black<br>Mass          | None                                    | Fe/cathode<br>Mass Ratio<br>0.15 | 1    | N.A.                                                  | 80    | N.S.    | N.S.      | N.S.                                 | -                             | -                                                         |
| [123]    | Discharge<br>Manual<br>Separation<br>Alkaline<br>Leaching                                                                           | LFP                      | Cathodic Black<br>Mass                        | H <sub>2</sub> O <sub>2</sub> [O]       |                                  | 0.3  | H <sub>2</sub> O <sub>2</sub> /Li Molar<br>Ratio 2.07 | 60    | 120     | 95        | Li = 97%<br>Fe =<br>0.03%<br>P = 2%  | High<br>selectivity           | Low value Fe<br>product                                   |
| [43]     | N.A.                                                                                                                                | LFP<br>NMC<br>LCO        | Active<br>Material                            | H <sub>2</sub> O <sub>2</sub> [O] & [R] |                                  | 4    | 8.82                                                  | 80    | 120–180 | N.S.      | Ni, Co,<br>Mn =<br>~100%<br>Li = 80% | Blend of LIBs                 | High<br>concentration<br>of H <sub>2</sub> O <sub>2</sub> |
| [85,126] | Discharge (SS<br>Chips)<br>Shredding<br>Rare Earth<br>Magnetic<br>Alkaline<br>Leaching<br>Drying Screening<br>Density<br>Separation | LCO<br>LMO<br>NMC<br>LFP | Spent Active<br>Material and<br>Plastic Waste | H <sub>2</sub> O <sub>2</sub> [O] & [R] |                                  | 4    | 6.40                                                  | 70    | 120     | 285       | Ni, Mn =<br>~90%<br>Co = 80%         | Blend of LIBs                 | High<br>concentration<br>of H <sub>2</sub> O <sub>2</sub> |
| [223]    | Discharge<br>Manual<br>Separation<br>Calcining (600<br>°C)                                                                          | LFP                      | Cathode                                       | None                                    | pH = 2–4                         | N.S. | N.A.                                                  | 60–95 | 120–240 | 12.5 – 25 | N.S.                                 | -                             | -                                                         |
| [122]    | Dismantling<br>Manual<br>Separation                                                                                                 | LFP                      | Cathode                                       | H <sub>2</sub> O <sub>2</sub> [O]       |                                  | 2    | 30%<br>(N.S. if %w/w or<br>%v/v)                      | 60    | 120     | 100       | Li =<br>82.1%                        | High solid to<br>liquid ratio | Low value Fe<br>product                                   |

|       |                                                                                                                                      |     |                                  |                                   |                                      |     |      |      |      |      |                                   |                     |                      |
|-------|--------------------------------------------------------------------------------------------------------------------------------------|-----|----------------------------------|-----------------------------------|--------------------------------------|-----|------|------|------|------|-----------------------------------|---------------------|----------------------|
|       | Alkaline Leaching                                                                                                                    |     |                                  |                                   |                                      |     |      |      |      |      | Fe = 97.2%                        |                     |                      |
| [93]  | Discharge<br>Dismantling<br>Electrolyte recovery<br>(Supercritical CO <sub>2</sub> )<br>Physical Separation<br>Crushing<br>Calcining | LFP | Cathode                          | None                              |                                      | 2.5 | -    | 60   | 240  | 100  | Li = 97%<br>Fe = 98%              | No oxidizing agent  | Low value Fe product |
| [159] | Discharge<br>Dismantling<br>Manual Separation<br>Ultrasonic Delamination                                                             | NMC | Black Mass                       | H <sub>2</sub> O <sub>2</sub> [R] |                                      | 1   | 0.43 | N.S. | N.S. | N.S. | N.S.                              | -                   | -                    |
| [142] | Discharging<br>Drying<br>Crushing<br>Magnetic Separation<br>Sieving (16 mesh)                                                        | NMC | Black Mass                       | H <sub>2</sub> O <sub>2</sub> [R] | Na <sub>2</sub> S as Cu Precipitator | 2   | 2.56 | 60   | 60   | 100  | N.S.                              | -                   | -                    |
| [63]  | Dismantling<br>Discharging<br>Drying<br>Manual Separation<br>Crushing<br>Al Separation                                               | NMC | Black Mass with Al Contamination | H <sub>2</sub> O <sub>2</sub> [R] |                                      | 2   | 2.13 | 60   | 120  | 100  | Li, Ni, Co, Mn = ~98%<br>Al = 89% | High leaching rates | Long reaction time   |

|       |                                                                                                                                      |                 |                                                   |                                   |            |   |      |    |     |       |                                                 |                                      |                              |
|-------|--------------------------------------------------------------------------------------------------------------------------------------|-----------------|---------------------------------------------------|-----------------------------------|------------|---|------|----|-----|-------|-------------------------------------------------|--------------------------------------|------------------------------|
| [143] | Discharging<br>NaCl<br>Manual<br>Separation<br>Vacuum<br>Pyrolysis (200 °C)<br>Alkaline leaching<br>Calcination (500 °C)<br>Grinding | LCO             | Calcined<br>Active<br>Material                    | H <sub>2</sub> O <sub>2</sub> [R] |            | 2 | 3.41 | 70 | 60  | 20–50 | Co = 99%<br>Li = 99%                            | High<br>leaching rates               | Low solid to<br>liquid ratio |
| [144] | Crushing-Sieving<br>Magnetic<br>Separation<br>Eddy Current<br>Separation                                                             | Mixed<br>Oxides | Black Mass<br>from<br>Pretreatment<br>Pilot Plant | H <sub>2</sub> O <sub>2</sub> [R] |            |   |      |    |     |       |                                                 | -                                    | -                            |
| [133] | Discharging<br>Manual<br>Separation<br>Drying                                                                                        | LCO             | Cathode                                           | H <sub>2</sub> O <sub>2</sub> [R] | Sonication | 1 | 2.13 | 60 | 60  | 20–50 | Li, Co =<br>~100%                               | High<br>leaching rates               | Low solid to<br>liquid ratio |
| [131] | Crushing<br>Wet Scrubbing<br>Drying                                                                                                  | Mixed<br>LIBs   | Cathodic Black<br>Mass                            | H <sub>2</sub> O <sub>2</sub> [R] |            | 2 | 4.26 | 30 | 180 | 75    | Li = 99%<br>Co = 97%<br>Mn =<br>99%<br>Cu = 97% | Mixed LIBs<br>High<br>leaching rates | Long reaction<br>time        |

**Table S2.** Summary of purification and extraction processes in sulfate medium; here, EMD, D2EHPA, LCO, NMC, and LFP are electrolytic manganese dioxide, di-(2-ethylhexyl)phosphoric acid, lithium-cobalt oxide, lithium-nickel-manganese-cobalt oxide, and lithium-iron phosphate, respectively; N.A. stands for “Not Applicable”; N.S. stands for “Not Specified”.

| Reference(s) | Purification Process (Reagents)                                                                                                                                                                                            | Final Product(s)                                                                                                                                                                                 | Recovery Rate (%)      | Comments |
|--------------|----------------------------------------------------------------------------------------------------------------------------------------------------------------------------------------------------------------------------|--------------------------------------------------------------------------------------------------------------------------------------------------------------------------------------------------|------------------------|----------|
| [160]        | Cu Cementation (Steel Shots)<br>Fe Precipitation (NaOH)<br>Co Precipitation (NaClO)<br>Co Electrowining<br>Li Precipitation (H <sub>3</sub> PO <sub>4</sub> )                                                              | Cu(s)<br>Fe(OH) <sub>3</sub> (s)<br>Co(OH) <sub>3</sub> or Co(s)<br>Li <sub>3</sub> PO <sub>4</sub> (s);                                                                                         | N.S.                   |          |
| [145]        | Metal Precipitation (NaOH)<br>Electrodialysis                                                                                                                                                                              | (Mn, Ni, Co)(OH) <sub>2</sub> (s)<br>LiOH(aq)                                                                                                                                                    | N.S.                   |          |
| [132]        | Alkalinization (NaOH)<br>Co Precipitation ((NH <sub>4</sub> ) <sub>2</sub> C <sub>2</sub> O <sub>4</sub> )<br>Li Precipitation (Na <sub>2</sub> CO <sub>3</sub> )                                                          | CoC <sub>2</sub> O <sub>4</sub> (s)<br>Li <sub>2</sub> CO <sub>3</sub> (s)<br>Waste Na <sub>2</sub> SO <sub>4</sub> (aq)                                                                         | Co = 94.7%<br>Li = 71% |          |
| [127]        | Fe, Al, Cu Precipitation (NaOH)<br>Co Solvent Extraction (Cyanex 272)<br>Co Precipitation (Na <sub>2</sub> CO <sub>3</sub> )<br>Ni,Mn Precipitation (Na <sub>2</sub> CO <sub>3</sub> )<br>Li Crystallization (Evaporation) | (Fe, Al)OH <sub>3</sub> ; Cu(OH) <sub>2</sub> (s)<br>Co(CO <sub>3</sub> )(s)<br>(Ni, Mn)CO <sub>3</sub> (s)<br>Li <sub>2</sub> CO <sub>3</sub> (s)<br>Waste Na <sub>2</sub> SO <sub>4</sub> (aq) | Co = 98%<br>Li = 80%   |          |
| [137]        | Co Solvent Extraction (D2EHPA)<br>Alkalinization (NaOH)<br>Co Hydrothermal Precipitation (CH <sub>4</sub> N <sub>2</sub> S)<br>Li Precipitation (Na <sub>2</sub> CO <sub>3</sub> )                                         | CoS(s)<br>Li <sub>2</sub> CO <sub>3</sub> (s)<br>Waste Na <sub>2</sub> SO <sub>4</sub> (aq)                                                                                                      | N.S.                   |          |

|       |                                                                                                                                                                                                                                                                                                                                          |                                                                                                                                                                                                          |                                                |                                                                                          |
|-------|------------------------------------------------------------------------------------------------------------------------------------------------------------------------------------------------------------------------------------------------------------------------------------------------------------------------------------------|----------------------------------------------------------------------------------------------------------------------------------------------------------------------------------------------------------|------------------------------------------------|------------------------------------------------------------------------------------------|
| [72]  | Fe Precipitation (Na <sub>2</sub> SO <sub>4</sub> ) (pH = 2; 95 °C; 2 h)<br>Mn Precipitation ((NH <sub>4</sub> ) <sub>2</sub> (S <sub>2</sub> O <sub>8</sub> )<br>Cu Precipitation (NaOH)<br>Co Solvent Extraction (P <sub>5</sub> O <sub>7</sub> )<br>Co Precipitation (NH <sub>4</sub> ) <sub>2</sub> (C <sub>2</sub> O <sub>4</sub> ) | Na <sub>2</sub> Fe <sub>6</sub> (SO <sub>4</sub> ) <sub>4</sub> .12(OH)(s)<br>MnO <sub>2</sub> (s)<br>Cu(OH) <sub>2</sub> (s)<br>CoC <sub>2</sub> O <sub>4</sub> (s)<br>Waste(Li, Na, Ni)<br>Sulfate(aq) | Fe = 99%<br>Mn = 99%<br>Cu = 98,5%<br>Co = 98% |                                                                                          |
| [130] | Co Electrowinning<br>Mn Electrowinning                                                                                                                                                                                                                                                                                                   | Co(s)<br>EMD (Electrolytic Manganese Dioxide)<br>Waste Na <sub>2</sub> SO <sub>4</sub> (aq)                                                                                                              | Co = 96%<br>Mn = 99%<br>Cu = 97%               | pH 2–2.5 is a critical parameter for Co-metal and EMD.<br>T = 90 °C 200 A/m <sup>2</sup> |
| [158] | Coprecipitation (NaOH + NH <sub>4</sub> (OH))<br>NMC Synthesis-Sintering (Li <sub>2</sub> CO <sub>3</sub> (s))                                                                                                                                                                                                                           | NMC(s)<br>Waste Na <sub>2</sub> SO <sub>4</sub> (aq)                                                                                                                                                     | N.S.                                           |                                                                                          |
| [161] | Co Solvent Extraction (PC88A)<br>Co Electrowinning                                                                                                                                                                                                                                                                                       | Co(s)<br>EMD (Electrolytic Manganese Dioxide)<br>Waste Na <sub>2</sub> SO <sub>4</sub> (aq)                                                                                                              | N.S.                                           | Electrowinning at pH = 2 for, 50 mA/cm <sup>2</sup> , and 50–60 °C                       |
| [119] | Mn Precipitation (NaClO)<br>Al Precipitation (NaOH)<br>Cu Precipitation (NaOH)<br>Co Precipitation (Na <sub>2</sub> CO <sub>3</sub> )<br>Li Precipitation (Na <sub>2</sub> CO <sub>3</sub> )                                                                                                                                             | MnO <sub>2</sub> (s)<br>Al(OH) <sub>3</sub> (s)<br>Cu(OH) <sub>2</sub> (s)<br>CoCO <sub>3</sub> (s)<br>Li <sub>2</sub> CO <sub>3</sub> (s)                                                               | N.S.                                           |                                                                                          |
| [146] | Metal Precipitation (NaOH)<br>Li Precipitation (Na <sub>2</sub> CO <sub>3</sub> )<br>Na Crystallization (Thermal)                                                                                                                                                                                                                        | (Ni, Mn, Co, Al)<br>Hydroxides<br>Li <sub>2</sub> CO <sub>3</sub> (s)<br>Na <sub>2</sub> SO <sub>4</sub> (s)                                                                                             | N.S.                                           |                                                                                          |

|       |                                                                                                                                                                                                                                                     |                                                                                                                |                                              |                                                                 |
|-------|-----------------------------------------------------------------------------------------------------------------------------------------------------------------------------------------------------------------------------------------------------|----------------------------------------------------------------------------------------------------------------|----------------------------------------------|-----------------------------------------------------------------|
| [153] | Co Solvent Extraction (Cyanex 272)<br>Co Electrowinning<br>Ni Electrowinning                                                                                                                                                                        | Co(s)<br>Ni(s)<br>Li <sub>2</sub> SO <sub>4</sub> Solution                                                     | Co = 100%                                    |                                                                 |
| [159] | Ni, Co, Mn Precipitation (Na <sub>2</sub> CO <sub>3</sub> +NH <sub>3</sub> H <sub>2</sub> O)<br>(Ni, Co, Mn)CO <sub>3</sub> Calcination<br>NMC Resynthesis (Li <sub>2</sub> CO <sub>3</sub> (s))                                                    | NMC(s)<br>Li <sub>2</sub> SO <sub>4</sub> Solution                                                             | Co = 97%<br>Mn = 97%<br>Ni = 96%             | 163 mAh/g at 0.1 C; 94% retention after 50 cycles; 138.3 at 1 C |
| [147] | Li Solution Evaporation<br>Fe Precipitation (N.A.)<br>Ca and Mg Precipitation (N.A.)<br>Mn Solvent Extraction (D2EHPA)<br>Co Solvent Extraction (PC88A)                                                                                             | Li <sub>2</sub> CO <sub>3</sub> (s)<br>MnSO <sub>4</sub> (s)<br>CoSO <sub>4</sub> (s)<br>NiSO <sub>4</sub> (s) | Li = 85%<br>Co = 98%<br>Mn = 99%<br>Ni = 97% |                                                                 |
| [150] | Al, Cu Fe, Ca Precipitation (NaOH)<br>Ni, Co, Mn Solvent Extraction (D2EHPA)<br>Ni, Co, Mn Precipitation (NaOH+NH <sub>3</sub> .H <sub>2</sub> O)<br>Li Precipitation (Na <sub>2</sub> CO <sub>3</sub> )                                            | Mixed Hydroxides<br>NMC(s)<br>Waste Li <sub>2</sub> SO <sub>4</sub>                                            | Co = 99%<br>Mn = 100%<br>Ni = 85%            | 150 at 0.5 C; 145 at 1 C; retention 96% at 1 C after 50 cycles  |
| [79]  | Co Ni Solvent Extraction (D2EHPA)<br>Ni Co Ferrite Precipitation (FeSO <sub>4</sub> +Citric Acid)                                                                                                                                                   | NiCo(ferrite)(s)<br>Waste Sulfate Solution                                                                     | N.S.                                         |                                                                 |
| [151] | Co Precipitation (C <sub>2</sub> H <sub>2</sub> O <sub>4</sub> )<br>Cu Solvent Extraction (Aldoxime based)<br>Co Solvent Extraction (Cyanex 272)<br>Li Precipitation (Na <sub>2</sub> CO <sub>3</sub> )<br>LiCo Precursor Precipitation (Sintering) | LCO(s)<br>Al(OH) <sub>3</sub> (s)<br>Waste Sulfate Solution                                                    | Cu = 98%<br>Co = 97%<br>Li = 80%             | 136 mAh/g at 0.2 C                                              |

|       |                                                                                                                                                                                                                                                                                                                                              |                                                                                                                                    |          |                                                           |
|-------|----------------------------------------------------------------------------------------------------------------------------------------------------------------------------------------------------------------------------------------------------------------------------------------------------------------------------------------------|------------------------------------------------------------------------------------------------------------------------------------|----------|-----------------------------------------------------------|
| [154] | Co Solvent Extraction (Cyanex 272)<br>Co Electrowinning<br>Ni Electrowinning                                                                                                                                                                                                                                                                 | CoSO <sub>4</sub> Solution<br>Spent Li <sub>2</sub> SO <sub>4</sub> Solution                                                       | Co = 44% |                                                           |
| [148] | Al Precipitation (NH <sub>4</sub> OH)<br>Co Solvent Extraction (Cyanex 272)                                                                                                                                                                                                                                                                  | CoSO <sub>4</sub> (s)<br>Al(OH) <sub>3</sub> (s)<br>Li-rich Solution                                                               | Co = 85% |                                                           |
| [149] | Cu Precipitation (Na <sub>2</sub> S)<br>Al and Fe Precipitation<br>Impurities Extraction (D2EHPA)<br>Mg Extraction (NaF)<br>(Co, Ni, Mn) Precipitation (Na <sub>2</sub> CO <sub>3</sub> + NH <sub>3</sub> H <sub>2</sub> O)<br>(Co, Ni, Mn) CO <sub>3</sub> (s) Calcination<br>NMC Synthesis (Li <sub>2</sub> CO <sub>3</sub> (s) Sintering) | CuS(s)<br>NMC(s)<br>Sulfate Waste Solution<br>Precipitate (Hydroxides)                                                             | N.S.     | 152 mAh/g at 0.2 C; 94% retention at 1 C after 50th cycle |
| [84]  | MnO <sub>2</sub> Electrolysis                                                                                                                                                                                                                                                                                                                | MnO <sub>2</sub> (s)<br>Sulfate Waste Solution                                                                                     | N.S.     |                                                           |
| [155] | Co Solvent Extraction (PC-88A)<br>Ni Precipitation (NaOH)<br>Li Precipitation (Li <sub>2</sub> CO <sub>3</sub> (s))                                                                                                                                                                                                                          | CoSO <sub>4</sub> (s)<br>NiSO <sub>4</sub> (s)<br>Li <sub>2</sub> CO <sub>3</sub> (s)<br>Waste Na <sub>2</sub> SO <sub>4</sub> (s) | N.S.     |                                                           |
| [134] | Li Precipitation (Na <sub>2</sub> CO <sub>3</sub> )                                                                                                                                                                                                                                                                                          | Li <sub>2</sub> CO <sub>3</sub> (s)<br>Waste Sulfate Solution<br>Co, Mn, Ni Oxides                                                 | N.S.     |                                                           |
| [152] | Co Precipitation (C <sub>2</sub> H <sub>2</sub> O <sub>4</sub> )                                                                                                                                                                                                                                                                             | Li-rich Spent Solution<br>CoC <sub>2</sub> O <sub>4</sub> (s)                                                                      | Co = 89% |                                                           |



|       |                                                                                                                                                                                                                                                     |                                                                                                                                                                     |                                        |                                                                               |
|-------|-----------------------------------------------------------------------------------------------------------------------------------------------------------------------------------------------------------------------------------------------------|---------------------------------------------------------------------------------------------------------------------------------------------------------------------|----------------------------------------|-------------------------------------------------------------------------------|
| [46]  | Oxidation (Fe Filing)<br>Neutralization (H <sub>3</sub> PO <sub>4</sub> )<br>Precipitation (Alkali)                                                                                                                                                 | Li <sub>3</sub> PO <sub>4</sub> (s)<br>Goethite (FeO(OH))<br>Waste SO <sub>4</sub> <sup>2-</sup> Brine                                                              | N.S.                                   |                                                                               |
| [123] | Alkalinization (NaOH)<br>Precipitation (Na <sub>2</sub> PO <sub>4</sub> ·12H <sub>2</sub> O)<br>FePO <sub>4</sub> -C Calcining                                                                                                                      | Li <sub>3</sub> PO <sub>4</sub> (s)<br>Na <sub>2</sub> SO <sub>4</sub> (aq) Waste Brine<br>FePO <sub>4</sub> (s)                                                    | Li = 95.6%<br>Fe = 99.98%<br>P = 98.0% |                                                                               |
| [43]  | Fe Precipitation (NaOH)<br>Li Precipitation (Na <sub>2</sub> CO <sub>3</sub> )<br>NMC Milling<br>NMC Sintering<br>LFP-C Calcining                                                                                                                   | Fe(OH) <sub>3</sub> (s)<br>LiNi <sub>1/3</sub> Mn <sub>1/3</sub> Co <sub>1/3</sub> O <sub>2</sub> (s)<br>LFP(s)<br>Na <sub>2</sub> SO <sub>4</sub> (aq) Waste Brine | Li = 80%<br>Co, Ni, Mn =<br>100%       | NMC = 130 mAh/g at C/3.4–82% retention after 50 cycles<br>173 mAh/g at C/13.7 |
| [223] | Leaching (NaOH)<br>Li Precipitation (Na <sub>3</sub> PO <sub>4</sub> )                                                                                                                                                                              | Li <sub>3</sub> PO <sub>4</sub> (s)<br>Fe <sub>2</sub> O <sub>3</sub> (s)<br>Na <sub>2</sub> SO <sub>4</sub> (aq) Waste Brine<br>Cu, Al and Fe-rich<br>Solution     | N.S.                                   |                                                                               |
| [122] | Fe Precipitation (NaOH)<br>Li Precipitation (Na <sub>2</sub> CO <sub>3</sub> )                                                                                                                                                                      | Li <sub>2</sub> CO <sub>3</sub> (s)<br>Na <sub>2</sub> SO <sub>4</sub> (aq)<br>Fe(OH) <sub>3</sub> (s)                                                              | Li = 82.1%                             |                                                                               |
| [93]  | Fe Precipitation (NH <sub>3</sub> )<br>FePO <sub>4</sub> Carbo-Thermal Treatment<br>Li Solution Evaporation<br>Li Precipitation (Na <sub>2</sub> CO <sub>3</sub> )<br>Fe and Li Milling (Sucrose + Ethanol)<br>LFP Annealing (Ar + H <sub>2</sub> ) | LFP/C(s)<br>Na <sub>2</sub> SO <sub>4</sub> (aq) Waste Brine                                                                                                        | N.S.                                   | 152 mAh/g at 0.2 C; 138 mAh/g at 1 C                                          |

|          |                                                                                                                                                                                                                                                                                                                  |                                                                                                                                                                                                                                     |                                               |                                                                                                 |
|----------|------------------------------------------------------------------------------------------------------------------------------------------------------------------------------------------------------------------------------------------------------------------------------------------------------------------|-------------------------------------------------------------------------------------------------------------------------------------------------------------------------------------------------------------------------------------|-----------------------------------------------|-------------------------------------------------------------------------------------------------|
| [63]     | Al Precipitation (NaOH)<br>NMC(OH) <sub>2</sub> Precipitation (NaOH+NH <sub>4</sub> OH)<br>Li Precipitation (Na <sub>2</sub> CO <sub>3</sub> )                                                                                                                                                                   | Li <sub>2</sub> CO <sub>3</sub> (s)<br>Ni <sub>1/3</sub> Mn <sub>1/3</sub> Co <sub>1/3</sub> (OH) <sub>2</sub> (s)<br>Al(OH) <sub>3</sub> (s)<br>Na <sub>2</sub> SO <sub>4</sub> (aq) Waste Brine                                   | Li = 80%<br>Co, Ni, Mn =<br>100%              |                                                                                                 |
| [143]    | Co Precipitation (NaOH)<br>Co(OH) <sub>2</sub> Calcination<br>Co Electrolysis (molten salt)<br>pH Adjustment (NaOH)<br>Li Precipitation (Na <sub>2</sub> CO <sub>3</sub> )                                                                                                                                       | Co(s)<br>Li <sub>2</sub> CO <sub>3</sub> (s)<br>Spent Na <sub>2</sub> SO <sub>4</sub> (aq)                                                                                                                                          | N.S.                                          |                                                                                                 |
| [144]    | Fe Precipitation (NaOH)<br>Mn Al Cu Solvent Extraction (D2EHPA)<br>MnCo Ferrite Precipitation (NaOH<br>Microwave)<br>Co Solvent Extraction (Cyanex 272)<br>Co Precipitation (Na <sub>2</sub> C <sub>2</sub> O <sub>4</sub> NaOH)<br>Evapo-crystallization<br>Li Precipitation (Na <sub>2</sub> CO <sub>3</sub> ) | MnCoFe <sub>2</sub> O <sub>4</sub> (s)<br>Co <sub>3</sub> O <sub>4</sub> (s)<br>Ni(OH) <sub>2</sub> (s)<br>Na <sub>2</sub> SO <sub>4</sub> (s)<br>Li <sub>2</sub> CO <sub>3</sub> (s)<br>Spent Na <sub>2</sub> SO <sub>4</sub> (aq) | Co = 100%<br>Li = 90%<br>Ni = 91%<br>Mn = 96% | Respective capacity for MnCo ferrite and NiO as anode materials reached 700 mAh/g and 400 mAh/g |
| [133]    | Co Precipitation (NaOH)<br>Li Precipitation (CO <sub>2</sub> )<br>Li Brine Evaporation<br>Li Saltwater Wash                                                                                                                                                                                                      | Co(OH) <sub>2</sub> (s)<br>Li <sub>2</sub> CO <sub>3</sub> (s)<br>Na <sub>2</sub> SO <sub>4</sub> (aq)                                                                                                                              | N.S.                                          |                                                                                                 |
| [85,126] | Fe Al Cu Precipitation (NaOH)<br>Co Ni Mn Concentration Adjustment (SO <sub>4</sub><br>Salt)<br>Co Ni Mn Precipitation (NaOH + NH <sub>4</sub> OH)<br>NMC(OH) <sub>2</sub> Drying                                                                                                                                | NMC(s)<br>Fe, Al, Cu (OH)(s)<br>Spent Na <sub>2</sub> SO <sub>4</sub> (aq)                                                                                                                                                          | Ni, Mn, and<br>Co > 90%                       | Electrochemical properties for NMC<br>152 mAh/g at 0.2C<br>137 mAh/g at 1C<br>No stability data |

|       |                                                                                                                                                                                                                                                                                           |                                                                                                                                                                                    |                       |                                                                        |
|-------|-------------------------------------------------------------------------------------------------------------------------------------------------------------------------------------------------------------------------------------------------------------------------------------------|------------------------------------------------------------------------------------------------------------------------------------------------------------------------------------|-----------------------|------------------------------------------------------------------------|
|       | Mixing Milling (Li <sub>2</sub> CO <sub>3</sub> )<br>NMC sintering<br>NMC Milling                                                                                                                                                                                                         |                                                                                                                                                                                    |                       |                                                                        |
| [131] | Fe and Mn precipitation ((NH <sub>4</sub> ) <sub>2</sub> S <sub>2</sub> O <sub>8</sub> )<br>Cu Solvent extraction (LIX 84IC)<br>CuSO <sub>4</sub> evaporation-crystallization<br>Co solvent extraction (Cyanex 272)<br>CoSO <sub>4</sub> evaporation-crystallization<br>Co electrowinning | MnO <sub>2</sub> + Fe <sub>2</sub> (SO <sub>4</sub> ) <sub>3</sub> (s)<br>CuSO <sub>4</sub> (s)<br>CoSO <sub>4</sub> (s)<br>Co(s)<br>Li <sub>2</sub> SO <sub>4</sub> solution (aq) | Co = 98%<br>Cu = 100% | Co electrowinning:<br>Ti cathode + Pb-Sb anode at 200 A/m <sup>2</sup> |

**Table S3.** Summary of leaching processes with hydrochloric acid; here, LCO, LTO, NMC, LMO, LFP-C, and NMP are lithium-cobalt oxide, lithium-titanate-oxide, lithium-nickel-manganese-cobalt oxide, lithium-manganese-oxide, lithium-iron-phosphate, and n-methyl-2-pyrrolidone, respectively; N.A. stands for “Not Applicable”; N.S. stands for “Not Specified”.

| Reference | Pretreatment                                                                           | Treated Battery Type(s) | Leach Feed        | Reducing [R] Oxidizing [O] Agent | Special Leaching Condition(s)     | Acid Concentration (M) | Reducer/Oxidizer Concentration (M) | T (°C) | Leaching Time (min) | Solid Concentration (g/L) | Leaching Rate (%)                            | Pros                                            | Cons                                    |
|-----------|----------------------------------------------------------------------------------------|-------------------------|-------------------|----------------------------------|-----------------------------------|------------------------|------------------------------------|--------|---------------------|---------------------------|----------------------------------------------|-------------------------------------------------|-----------------------------------------|
| [129]     | Crushing/Sieving<br>Drying                                                             | LCO                     | Black Mass        | No                               |                                   | 2                      | N.A.                               | 60     | 90                  | 20                        | Co = 100%<br>Li = 100%                       | No reducing agent                               | Low solid to liquid ratio               |
| [74]      | Wet Shredding<br>Density Separation<br>Sieving (35 mesh)<br>Calcining (500 °C for 1 h) | Blend of LIBs           | Active Material   | No                               |                                   | 1.75                   | N.A.                               | 50     | 90                  | 200                       | Co = 99%<br>Mn = 99%                         | High solid to liquid ratio<br>No reducing agent | Complex pretreatment                    |
| [170]     | Dismantling<br>Shredding<br>Sieving<br>Milling                                         | NMC<br>LCO<br>LMO       | Cathode and Anode | No                               | Electrochemical Acid Regeneration | 4                      | N.A.                               | 22     | 4 h                 | 100                       | Co = 20%<br>Li = 38%<br>Mn = 31%<br>Ni = 17% | Electrochemical acid generation                 | Low leaching rate<br>Long reaction time |

|       |                                                                                                                                           |                   |                             |                                   |  |   |                                   |    |     |      |                                                                  |                      |                                  |
|-------|-------------------------------------------------------------------------------------------------------------------------------------------|-------------------|-----------------------------|-----------------------------------|--|---|-----------------------------------|----|-----|------|------------------------------------------------------------------|----------------------|----------------------------------|
| [169] | Crushing/Sieving<br>Binder<br>Dissolution<br>(NMP)<br>Foil Separation                                                                     | LCO               | Active<br>Material          | No                                |  | 4 | N.A.                              | 80 | 60  | N.S. | N.S.                                                             | -                    | -                                |
| [162] | Dismantling<br>Manual<br>Separation<br>Electrodes Drying<br>Water Wash<br>(Cathode<br>Delamination)<br>Filtration/Water<br>Wash<br>Drying | LCO               | Black<br>Mass               | H <sub>2</sub> O <sub>2</sub> [R] |  | 3 | 0.75                              | 80 | 120 | 18   | N.S.                                                             | -                    | -                                |
| [42]  | Dismantling<br>Manual<br>Separation<br>Black Mass<br>Scraping                                                                             | LCO               | Black<br>Mass               | No                                |  | 4 | N.A.                              | 80 | 60  | 100  | Co = 99%<br>Li = 99%                                             | No reducing<br>agent | Only<br>applicable to<br>LCO     |
| [163] | Dismantling<br>Manual<br>Separation<br>Binder<br>Dissolution<br>(NMP)<br>Foil Separation                                                  | LCO               | Active<br>Material          | H <sub>2</sub> O <sub>2</sub> [R] |  | 3 | 3.5%<br>(N.S. if %w/w<br>or %v/v) | 80 | 60  | 50   | Co = 83%<br>Li = 83%                                             |                      | Low leaching<br>rate             |
| [171] | N.A.                                                                                                                                      | LCO<br>LMO<br>NMC | Fresh<br>Active<br>Material | No                                |  | 4 | N.A.                              | 80 | 60  | 20   | Co =<br>99.5%<br>Li =<br>99.9%<br>Ni =<br>99.8%<br>Mn =<br>99.8% | No reducing<br>agent | Not tested on<br>spent batteries |

|       |                                                                                                 |                 |                           |                                   |  |        |           |           |      |        |                                      |                               |                                           |
|-------|-------------------------------------------------------------------------------------------------|-----------------|---------------------------|-----------------------------------|--|--------|-----------|-----------|------|--------|--------------------------------------|-------------------------------|-------------------------------------------|
| [164] | Dismantling<br>Manual<br>Separation<br>Binder<br>Dissolution<br>(NMP)<br>Carbon Flotation       | LFP<br>LTO      | Cathodic<br>Black<br>Mass | No                                |  | pH = 2 | N.A.      | 80        | 480  | N.S.   | Fe =<br>100%<br>Ti = 0%<br>Li = 100% | Treatment of<br>LTO & LFP     | Long reaction<br>time                     |
| [86]  | N.S.                                                                                            | LFP<br>LMO      | Cathode                   | H <sub>2</sub> O <sub>2</sub> [O] |  | 6.5    | 6.4       | 60        | 120  | 200    | Li = 92%<br>Fe = 92%<br>Mn =<br>90%  | High solid to<br>liquid ratio | High acid and<br>reducer<br>concentration |
| [167] | Crushing<br>Thermal<br>Treatment (300<br>°C)<br>Sieving<br>Calcining (700 °C)                   | LFP             | Calcined<br>Black<br>Mass | None                              |  | N.A.   | -         | N.S.      | N.S. | N.S.   | N.S.                                 | -                             | -                                         |
| [166] | Dismantling<br>Manual<br>Separation<br>Calcining (700 °C)                                       | LFP             | Calcined<br>Black<br>Mass | None                              |  | 6      | -         | 120       | 360  | 50     | N.S.                                 | -                             | -                                         |
| [172] | Crushing/ Sieving<br>(1 mm)<br>Magnetic<br>Separation                                           | Mixed<br>Oxides | Fines<br>from<br>Crushing | O <sub>2</sub> [O]                |  | 4      | 0.133 L/s | 50–<br>80 | 120  | 50–100 | N.S.                                 | Simple<br>pretreatment        | Long reaction<br>time                     |
| [19]  | Spent Cathode<br>Al Delamination<br>(NaOH)<br>Black Mass<br>Milling (2 h)<br>Calcining (600 °C) | LFP             | Calcined<br>Black<br>Mass | None                              |  | 4      | N.A.      | N.S.      | N.S. | N.S.   | N.S.                                 | -                             | -                                         |

**Table 4.** Summary of purification and extraction processes in chloride medium; here, LFP is lithium-iron-phosphate; N.A. stands for “Not Applicable”; N.S. stands for “Not Specified”.

| Reference | Purification Process (Reagents)                                                                                                                                                                                                                                                                                                              | Final Product(s)                                                                                                                              | Recovery Rate (%)                            | Comments                                                                 |
|-----------|----------------------------------------------------------------------------------------------------------------------------------------------------------------------------------------------------------------------------------------------------------------------------------------------------------------------------------------------|-----------------------------------------------------------------------------------------------------------------------------------------------|----------------------------------------------|--------------------------------------------------------------------------|
| [74]      | Mn Precipitation (NaClO)<br>Al and Cu Precipitation (NaOH)<br>Co Precipitation (Na <sub>2</sub> CO <sub>3</sub> )<br>Li Precipitation (Na <sub>2</sub> CO <sub>3</sub> )<br>NaCl Crystallization (HCl)                                                                                                                                       | Mn oxides(s)<br>Cu(OH) <sub>2</sub> (s)<br>Al(OH) <sub>3</sub> (s)<br>CoCO <sub>3</sub> (s)<br>Li <sub>2</sub> CO <sub>3</sub> (s)<br>NaCl(s) | Co = 90%<br>Mn = 95%                         |                                                                          |
| [169]     | Co Precipitation (NaOH)                                                                                                                                                                                                                                                                                                                      | Co(OH) <sub>2</sub> (s)<br>Li and Na solution                                                                                                 | N.S.                                         |                                                                          |
| [162]     | Co(OH) <sub>2</sub> Electrodeposition<br>Co Electrowinning (H <sub>2</sub> SO <sub>4</sub> )                                                                                                                                                                                                                                                 | Co(s)<br>Waste Chloride Solution<br>Waste Sulfate Solution                                                                                    | N.S.                                         |                                                                          |
| [42]      | Co Solvent Extraction (PC-88A + H <sub>2</sub> SO <sub>4</sub> )<br>Li Precipitation (Na <sub>2</sub> CO <sub>3</sub> )                                                                                                                                                                                                                      | 99.99% CoSO <sub>4</sub> (s)<br>Li <sub>2</sub> CO <sub>3</sub> (s)<br>Waste Sulfate Solution<br>Waste Chloride Solution                      | Co = 99.99%<br>Li = 80%                      | Scrubbing coextracted Li in organic phase with CoCl <sub>2</sub> and HCl |
| [171]     | Mn Precipitation (KMnO <sub>4</sub> )<br>Ni Precipitation (C <sub>4</sub> H <sub>8</sub> N <sub>2</sub> O <sub>2</sub> + NH <sub>3</sub> )<br>C <sub>4</sub> H <sub>8</sub> N <sub>2</sub> O <sub>2</sub> Regeneration (HCl)<br>Ni Re-precipitation (NaOH)<br>Co Precipitation (NaOH)<br>Li Precipitation (Na <sub>2</sub> CO <sub>3</sub> ) | MnO <sub>2</sub> (s)<br>Ni(OH) <sub>2</sub> (s)<br>Co(OH) <sub>2</sub> (s)<br>Li <sub>2</sub> CO <sub>3</sub> (s)<br>Waste Chloride Solution  | Co = 97%<br>Li = 97%<br>Ni = 97%<br>Mn = 98% |                                                                          |

|       |                                                                                                                                                                                                                                             |                                                                                                                                           |                                  |                                                                         |
|-------|---------------------------------------------------------------------------------------------------------------------------------------------------------------------------------------------------------------------------------------------|-------------------------------------------------------------------------------------------------------------------------------------------|----------------------------------|-------------------------------------------------------------------------|
| [164] | Fe Oxidation (H <sub>2</sub> O <sub>2</sub> )<br>Fe Precipitation (NH <sub>3</sub> )<br>Purification (Ion Exchange)<br>Stripping (HCl)<br>Li Precipitation (Na <sub>2</sub> CO <sub>3</sub> )                                               | Li <sub>2</sub> CO <sub>3</sub> (s)<br>FePO <sub>4</sub> ·xH <sub>2</sub> O(s)<br>TiO <sub>2</sub> (s)<br>Spent NaCl Brine                | Li = 80%<br>Fe = 95.8%           |                                                                         |
| [86]  | Fe Ionic Flotation ([Hbet][Tf <sub>2</sub> N])<br>Mn Precipitation (KMnO <sub>4</sub> )<br>Li Precipitation (Na <sub>3</sub> PO <sub>4</sub> )                                                                                              | FeCl <sub>3</sub><br>MnO <sub>2</sub> (s) + Mn <sub>2</sub> O <sub>3</sub> (s)<br>Li <sub>3</sub> PO <sub>4</sub> (s)<br>Spent NaCl Brine | Li = 81%<br>Fe = 85%<br>Mn = 81% |                                                                         |
| [167] | Fe Precipitation (NH <sub>4</sub> )<br>FePO <sub>4</sub> Crystallization (H <sub>3</sub> PO <sub>4</sub> )<br>LFP Milling-Sintering (Li, C, N <sub>2</sub> -H <sub>2</sub> )<br>Li solution Evaporation<br>LiCl Heat Treatment (350–700 °C) | LFP(s)<br>LiCl(s)                                                                                                                         | N.S.                             |                                                                         |
| [166] | Fe Precipitation (NH <sub>4</sub> OH)<br>Crystallization (H <sub>3</sub> PO <sub>4</sub> )<br>Synthesis (LiOH + Sucrose)<br>Annealing (Ar+ H <sub>2</sub> )                                                                                 | LFP/C(s)<br>Waste Brine<br>Spent LiCl Solution                                                                                            | N.S.                             |                                                                         |
| [172] | Fe Al Cu Precipitation (NaOH)<br>Ni, Co, Mn Precipitation (Na <sub>2</sub> CO <sub>3</sub> )<br>Li Precipitation (Na <sub>2</sub> CO <sub>3</sub> )                                                                                         | Al, Fe, Cu (OH) <sub>2</sub> (s)<br>(Ni, Mn, Co)CO <sub>3</sub> (s)<br>Spent NaCl(aq)<br>Li <sub>2</sub> CO <sub>3</sub> (s)              | Co = 95%<br>Mn = 92%<br>Ni = 95% |                                                                         |
| [19]  | FePO <sub>4</sub> ·2H <sub>2</sub> O Precipitation (NH <sub>4</sub> OH + Na <sub>3</sub> PO <sub>4</sub> )<br>LiFePO <sub>4</sub> Synthesis (Calcination Li <sub>2</sub> CO <sub>3</sub> + Glucose)                                         | Al<br>LiFePO <sub>4</sub> (1)                                                                                                             | Fe = 93%<br>Li = 82%             | LFP (1) shows low capacities:<br>141 mAh/g at 0.2 C<br>134 mAh/g at 1 C |

|  |                                                                                                                                                                                                                                                                                                                                       |                                    |  |                                                                                                            |
|--|---------------------------------------------------------------------------------------------------------------------------------------------------------------------------------------------------------------------------------------------------------------------------------------------------------------------------------------|------------------------------------|--|------------------------------------------------------------------------------------------------------------|
|  | Li <sub>3</sub> PO <sub>4</sub> Precipitation (NH <sub>4</sub> OH)<br>Li <sub>3</sub> PO <sub>4</sub> Solubilization (H <sub>3</sub> PO <sub>4</sub> )<br>Impurity Removal (NH <sub>4</sub> OH)<br>LiFePO <sub>4</sub> Hydrothermal Synthesis (FeSO <sub>4</sub> + Ascorbic Acid)<br>Carbonation (Glucose + H <sub>2</sub> at 600 °C) | LiFePO <sub>4</sub> (2)<br>Glucose |  | LFP (2) shows good capacities:<br>157 mAh/g at 0.2 C<br>146 mAh/g at 1 C<br>97% retention after 100 cycles |
|--|---------------------------------------------------------------------------------------------------------------------------------------------------------------------------------------------------------------------------------------------------------------------------------------------------------------------------------------|------------------------------------|--|------------------------------------------------------------------------------------------------------------|

**Table 5.** Summary of leaching processes with nitric acid; here, LCO, NMC, LFP, and NMP are lithium-cobalt oxide, lithium-nickel-manganese-cobalt oxide, lithium-iron-phosphate, and n-methyl-2-pyrrolidone; N.A. stands for “Not Applicable”; N.S. stands for “Not Specified”.

| Reference | Pretreatment                                                                                                                     | Treated Battery Type(s) | Leach Feed               | Reducing [R] or Oxidizing [O] Agent | Special Leaching Condition(s) | Acid Concentration (M) | Reducer Concentration     | T (°C) | Leaching Time (min) | Solid Concentration (g/L or other) | Recovery Rate (%)                              | Pros                    | Cons                      |
|-----------|----------------------------------------------------------------------------------------------------------------------------------|-------------------------|--------------------------|-------------------------------------|-------------------------------|------------------------|---------------------------|--------|---------------------|------------------------------------|------------------------------------------------|-------------------------|---------------------------|
| [75]      | Discharging<br>Dismantling<br>Manual Separation<br>Binder Dissolution (NMP)<br>Calcination (700 °C for 5 h)<br>Alkaline Leaching | Blend of LIBs           | Active Material          | H <sub>2</sub> O <sub>2</sub> [R]   |                               | 1                      | 0.85                      | 70     | 120                 | N.S.                               | N.S.                                           | -                       | -                         |
| [174]     | Discharging<br>Dismantling<br>Manual Separation<br>Calcination (600 °C for 5 h)                                                  | Blend of LIBs           | Calcined Active Material | Fe (grinding) [R]                   |                               | 1                      | 1:1 Ratio, 30 min Milling | 25     | 120                 | 0.15                               | Co = 91%<br>Li = 77%<br>Mn = 100%<br>Ni = 100% | Low cost reducing agent | Low solid to liquid ratio |
| [176]     | Discharging<br>Dismantling<br>Manual Separation                                                                                  | LCO                     | Black Mass               | H <sub>2</sub> O <sub>2</sub> [R]   |                               | 3                      | 4.3                       | N.S.   | N.S.                | N.S.                               | N.S.                                           | -                       | -                         |
| [99]      | Discharging<br>Dismantling<br>Manual Separation<br>Binder Dissolution                                                            | NMC                     | Calcined Active Material | H <sub>2</sub> O <sub>2</sub> [R]   |                               | N.S.                   | 1.2                       | 120    | 120                 | 21                                 | N.S.                                           | -                       | -                         |



|       |                                                                                                                                             |                  |                                |                                   |   |                              |    |      |      |                                               |                        |                                                       |  |
|-------|---------------------------------------------------------------------------------------------------------------------------------------------|------------------|--------------------------------|-----------------------------------|---|------------------------------|----|------|------|-----------------------------------------------|------------------------|-------------------------------------------------------|--|
|       | (NMP)<br>Calcination (750 °C<br>for 4 h)                                                                                                    |                  |                                |                                   |   |                              |    |      |      |                                               |                        |                                                       |  |
| [173] | Crushing                                                                                                                                    | Blend of<br>LIBs | Whole<br>Battery               | No                                | 2 | N.A.                         | 80 | 120  | N.S. | Li = 100%<br>Co = low<br>Ni = low<br>Mn = 95% | Sample<br>pretreatment | Low leaching<br>rate                                  |  |
| [175] | 1st Thermal<br>Treatment (150 °C<br>for 1 h)<br>Shredding/Sieving<br>2nd Thermal<br>Treatment<br>Sieving<br>Calcination (900 °C<br>for 1 h) | LCO              | Calcined<br>Active<br>Material | H <sub>2</sub> O <sub>2</sub> [R] | 1 | 0.725                        | 75 | 30   | 20   | Li = 99%<br>Co = 99%                          | High<br>efficiencies   | Complex<br>pretreatment                               |  |
| [180] | Discharging<br>Manual Separation<br>Binder dissolution<br>(NMP)<br>Calcination (800 °C<br>for 2 h)                                          | LCO              | Calcined<br>Active<br>Material | H <sub>2</sub> O <sub>2</sub> [R] | 1 | 0.42                         | 80 | 60   | 20   | N.S.                                          | -                      | -                                                     |  |
| [122] | Dismantling<br>Manual Separation<br>Alkaline Leaching                                                                                       | LFP              | Cathodic<br>Black<br>Mass      | H <sub>2</sub> O <sub>2</sub> [O] | 3 | 30%<br>(N.S. if %s or<br>%v) | 50 | 1440 | 1    | Fe = 99%                                      | -                      | Long<br>reaction time<br>Low solid to<br>liquid ratio |  |

**Table 6.** Summary of purification and extraction processes in nitrate medium; here, LCO and NMC are lithium-cobalt oxide and lithium-nickel-manganese-cobalt oxide, respectively; N.A. stands for “Not Applicable”; N.S. stands for “Not Specified”.

| Reference | Purification Process (Reagents) | Final Product(s) | Recovery Rate (%) | Comments |
|-----------|---------------------------------|------------------|-------------------|----------|
|-----------|---------------------------------|------------------|-------------------|----------|

|       |                                                                                                                                                                                                                             |                                                                                                     |                      |                                                                                                                                                                                                  |
|-------|-----------------------------------------------------------------------------------------------------------------------------------------------------------------------------------------------------------------------------|-----------------------------------------------------------------------------------------------------|----------------------|--------------------------------------------------------------------------------------------------------------------------------------------------------------------------------------------------|
| [75]  | Impurities Precipitation (NaOH)<br>Ni Precipitation (Dimethylglyoxime)<br>Co Precipitation (NaOH)<br>Co Oxide Sintering                                                                                                     | Co <sub>3</sub> O <sub>4</sub> (s) Nanoplates<br>Waste Solution                                     | N.S.                 |                                                                                                                                                                                                  |
| [176] | CoFe <sub>2</sub> O <sub>4</sub> Precipitation (FeCl <sub>3</sub> .6H <sub>2</sub> O)<br>Fe(OH) <sub>3</sub> Precipitation (NH <sub>4</sub> .OH)<br>Washing (C <sub>2</sub> H <sub>7</sub> NO <sub>2</sub> )<br>Calcination | CoFe <sub>2</sub> O <sub>4</sub> (s)<br>Waste Lithium Solution                                      | N.S.                 | CoFe <sub>2</sub> O <sub>4</sub> used to oxidize methylene blue in textile industry effluent                                                                                                     |
| [173] | Fe and Ni Precipitation (NaOH)<br>Mn Precipitation (NaOH)                                                                                                                                                                   | Ni, Co and Fe Solid Residue<br>Mn(OH) <sub>2</sub> (s)<br>Li and Na Spent Solution                  | N.S.                 |                                                                                                                                                                                                  |
| [180] | Co Electrodeposition (LiOH)                                                                                                                                                                                                 | LCO(s)<br>Waste Li Solution                                                                         | N.S.                 | Electrodeposition parameters: 1 mA/cm <sup>2</sup> ; Ni anode; Pt cathode; <i>T</i> = 100; time 20 h<br>Refurbished material capacity: 130 mAh/g at 0.1 C 96% retention after 30 cycles at 0.1 C |
| [179] | Co Electrodeposition (LiOH)<br>Co(OH) <sub>2</sub> Calcining                                                                                                                                                                | Co <sub>3</sub> O <sub>4</sub> (s)<br>Waste Li Solution                                             | N.S.                 |                                                                                                                                                                                                  |
| [122] | Li Precipitation (Na <sub>2</sub> CO <sub>3</sub> )                                                                                                                                                                         | Li <sub>2</sub> CO <sub>3</sub> (s)<br>NaNO <sub>3</sub> (aq) Solution<br>FePO <sub>4</sub> (s)     | Li = 87%<br>Fe = 99% |                                                                                                                                                                                                  |
| [177] | Concentration and pH Adjustment (Ni, Co, Na <sub>2</sub> CO <sub>3</sub> )<br>Li(NMC)CO <sub>3</sub> Precipitation (NH <sub>4</sub> OH)                                                                                     | NMC <sub>(621)</sub> (s)<br>Li <sub>2</sub> CO <sub>3</sub> (s)<br>Spent NaNO <sub>3</sub> Solution | N.S.                 | Discharge capacity:<br>1st cycle: 239 mAh/g at 0.1 C                                                                                                                                             |

|                                                                                                                                                                               |  |  |  |                                                                             |
|-------------------------------------------------------------------------------------------------------------------------------------------------------------------------------|--|--|--|-----------------------------------------------------------------------------|
| Li(NMC)CO <sub>3</sub> Milling (LiOH)<br>NMC Calcination<br>Li Mother Liquor Purification<br>Li <sub>2</sub> CO <sub>3</sub> Precipitation (Na <sub>2</sub> CO <sub>3</sub> ) |  |  |  | 100th cycle: 194 mAh/g at 0.1 C<br>81.2% capacity retention after 100 cycle |
|-------------------------------------------------------------------------------------------------------------------------------------------------------------------------------|--|--|--|-----------------------------------------------------------------------------|

**Table S7.** Summary of leaching processes with other mineral acids/alkaline; here, LCO, LFP, NMP, and EDTA are lithium-cobalt oxide, lithium-iron-phosphate, n-methyl-2-pyrrolidone, and ethylenediaminetetraacetic acid, respectively; N.A. stands for “Not Applicable”; N.S. stands for “Not Specified”.

| Reference | Pretreatment                                                                                               | Treated Battery Type(s) | Leach Feed               | Reducing [R]/Oxidizing [O] Agent  | Leaching Agent                 | Special Leaching condition(s) | Acid Concentration (M) | Reducer/Oxidizer Concentration (M) | T (°C) | Leaching Time (min) | Solid Concentration (g/L) | Leaching Rate (%)                 | Pros                                | Cons                      |
|-----------|------------------------------------------------------------------------------------------------------------|-------------------------|--------------------------|-----------------------------------|--------------------------------|-------------------------------|------------------------|------------------------------------|--------|---------------------|---------------------------|-----------------------------------|-------------------------------------|---------------------------|
| [181]     | Discharging<br>Dismantling<br>Manual Separation<br>Alkaline Leaching<br>Calcination (650 °C for 5 h)       | LCO                     | Calcined Active Material | Glucose [R]                       | H <sub>3</sub> PO <sub>4</sub> |                               | 1.5                    | 0.85                               | 80     | 120                 | 2                         | Co = 98%<br>Li = 100%             | Low cost reducing agent             | Low solid to liquid ratio |
| [182]     | Discharging<br>Dismantling<br>Manual Separation<br>Calcination (300 °C)                                    | LCO                     | Active Material          | H <sub>2</sub> O <sub>2</sub> [R] | H <sub>3</sub> PO <sub>4</sub> |                               | 0.38                   | 0.85                               | 90     | 60                  | 8                         | Co = 99%<br>Li = 99%              | Low reducing agent concentration    | Low solid to liquid ratio |
| [184]     | Dismantling<br>Manual Separation                                                                           | LCO                     | Black Mass               | No                                | HF                             |                               | 8.6                    | N.A.                               | 75     | 120                 | 20                        | Co = 98%<br>Li = 80%              | No reducing agent                   | Dangerous Acid            |
| [186]     | Discharging<br>Dismantling<br>Manual Separation<br>Binder Dissolution (Cathode and Anode in NMP)<br>Drying | LCO                     | Black Mass               | H <sub>2</sub> O <sub>2</sub> [R] | H <sub>3</sub> PO <sub>4</sub> |                               | 0.7                    | 1.7                                | 40     | 60                  | 50                        | Co = 99%<br>Li = 99%              | Treatment of anode and cathode      | Applicable only to LCO    |
| [183]     | Discharge<br>Dismantling<br>Manual Separation                                                              | LFP                     | Cathodic Black Mass      | N.S.                              | H <sub>3</sub> PO <sub>4</sub> |                               | 0.5                    | N.A.                               | RT     | 40                  | 25                        | Li and Fe = 95%                   | Room temperature reaction           | Low value Fe product      |
| [185]     | Dismantling<br>Manual Separation                                                                           | LFP                     | Cathodic Black Mass      | H <sub>2</sub> O <sub>2</sub> [O] | -                              | 30 psi CO <sub>2</sub>        | N.A.                   | 0.15                               | 25     | 30                  | 100                       | Li = 90%<br>Fe = 0.5%<br>P = 2.5% | Low cost reagent<br>High efficiency | Pressurized reactor       |

|       |                                                                                                  |                            |                                       |                                                   |                                |                                                           |     |             |    |     |     |                                                   | Added-Value product                                                 |                                           |
|-------|--------------------------------------------------------------------------------------------------|----------------------------|---------------------------------------|---------------------------------------------------|--------------------------------|-----------------------------------------------------------|-----|-------------|----|-----|-----|---------------------------------------------------|---------------------------------------------------------------------|-------------------------------------------|
| [76]  | Discharge<br>Dismantling<br>Manual Separation<br>Sonication in Water<br>Ball Milling (with EDTA) | LFP                        | Cathodic<br>Black<br>Mass             | O <sub>2</sub> [O]                                | H <sub>3</sub> PO <sub>4</sub> | EDTA to LFP<br>Ratio = 3:1 in<br>Mechanical<br>Activation | 0.6 | N.A.        | RT | 20  | 50  | Li = 94%<br>Fe = 98%                              | High<br>Efficiency                                                  | Low value<br>Fe product                   |
| [187] | Crushing<br>Sieving (0.18 mm)<br>Gravity Separation                                              | Mixed<br>Ni and<br>Co LIBs | Fines<br>from<br>Crushed<br>Batteries | Ammonium Sulfite [R]                              | NH <sub>3</sub>                | Alkaline<br>Leaching<br>1 M<br>Ammonium<br>Bicarbonate    | 1.5 | 1           | 60 | 180 | 20  | Li = 60.5%<br>Ni = 99%<br>Cu = 99%<br>Co = 81%    | Low cost<br>reagent                                                 | Low<br>efficiencies                       |
| [188] | Discharge<br>Manual Dismantling<br>Shredding                                                     | LFP                        | Sliced<br>Cathode                     | Na <sub>2</sub> S <sub>2</sub> O <sub>8</sub> [O] | -                              |                                                           |     | 1.05 Excess | RT | 20  | 300 | Li = 99%<br>Fe = 0.05%<br>P = 0.59%<br>Al = 0.58% | Low cost<br>reagent<br>High<br>efficiency<br>Added-Value<br>product | Highly<br>corrosive<br>oxidizing<br>agent |

**Table S8.** Summary of purification and extraction processes in other mineral acid/alkaline medium; here, LFP is lithium-iron-phosphate; N.A. stands for “Not Applicable”; N.S. stands for “Not Specified”.

| Reference | Purification Process (Reagents)                                                                                               | Final Products                                                                                  | Recovery Rate (%)    | Comments                                                                           |
|-----------|-------------------------------------------------------------------------------------------------------------------------------|-------------------------------------------------------------------------------------------------|----------------------|------------------------------------------------------------------------------------|
| [182]     | Co Precipitation (Oxalic Acid)<br>Li Precipitation (NaOH + Ethanol)                                                           | CoC <sub>2</sub> O <sub>4</sub> (s)<br>Spent Na Solution<br>Li <sub>3</sub> PO <sub>4</sub> (s) | Li = 88%<br>Co = 99% |                                                                                    |
| [183]     | Reflux Evaporation<br>Washing (Ethanol)<br>Carbo-thermal Reduction (Li <sub>2</sub> CO <sub>3</sub> )<br>Milling<br>Sintering | LFP/C(s)<br>LiH <sub>2</sub> PO <sub>4</sub> (s)                                                | Li = 75%             | 159 mAh/g at 0.1 C<br>89.33 mAh/g at 20 C<br>95% retention after 500 cycles at 5 C |

|       |                                                                                                                            |                                                                                                                              |                      |  |
|-------|----------------------------------------------------------------------------------------------------------------------------|------------------------------------------------------------------------------------------------------------------------------|----------------------|--|
| [76]  | Fe Precipitation/Reflux Evaporation<br>Li Precipitation (NaOH)                                                             | FePO <sub>4</sub> ·2H <sub>2</sub> O(s)<br>Li <sub>3</sub> PO <sub>4</sub> (s)<br>Na <sub>3</sub> PO <sub>4</sub> (aq)       | Li = 83%<br>Fe = 93% |  |
| [188] | Leaching Residue Sieving<br>Filtrate Evaporation<br>Li Precipitation (Na <sub>2</sub> CO <sub>3</sub> )<br>Crystallization | FePO <sub>4</sub> (s)<br>Al<br>Li <sub>2</sub> CO <sub>3</sub> (s)<br>Na <sub>2</sub> SO <sub>4</sub> ·10H <sub>2</sub> O(s) | N.S.                 |  |

**Table S9.** Summary of leaching processes with organic acids; here, LCO, NMC, LMO, NMP, and PVC are lithium-cobalt oxide, lithium-nickel-manganese-cobalt oxide, lithium- manganese oxide, lithium-iron-phosphate, n-methyl-2-pyrrolidone, and polyvinyl chloride, respectively; N.A. stands for “Not Applicable”; N.S. stands for “Not Specified”.

| Reference(s) | Pretreatment                                                                                                     | Treated Battery Type(s) | Leach Feed               | Reducing [R]/ Oxidizing [O] Agent | Acid      | Acid Concentration (M) | Reducer Concentration (M) | T (°C) | Leaching Time (min) | Solid Concentration (g/L) | Recovery Rate (%)      | Pros                               | Cons                                                |
|--------------|------------------------------------------------------------------------------------------------------------------|-------------------------|--------------------------|-----------------------------------|-----------|------------------------|---------------------------|--------|---------------------|---------------------------|------------------------|------------------------------------|-----------------------------------------------------|
| [196]        | Discharge<br>Manual Dismantling<br>Cathode Separation<br>Binder Dissolution (NMP)<br>Drying (100 °C for 1 h)     | LCO                     | Active Material          | PVC [R]                           | PVC (HCl) | 3:1 PVC:LCO            | 3:1 PVC:LCO               | 350    | 30                  | 16                        | Co = 95%<br>Li = 98%   | Recycling of another plastic waste | High temperature<br>Low solid to liquid ratio       |
| [206]        | Discharge<br>Crushing<br>Sieving                                                                                 | LCO                     | Cathode and Anode        | No                                | Oxalic    | 1                      | N.A.                      | 95     | 150                 | 15                        | Co = 97%<br>Li = 98%   | No reducing agent                  | Expensive acid<br>Low solid to liquid ratio         |
| [191]        | Discharge<br>Dismantling<br>Cathode Separation<br>Black Mass Stripping<br>Grinding<br>Calcining (700 °C for 2 h) | LCO                     | Calcined Active Material | H <sub>2</sub> O <sub>2</sub> [R] | Formic    | 01:10                  | 2.56                      | 70     | 20                  | 20                        | Co = 100%<br>Li = 100% | High efficiencies                  | High concentration of H <sub>2</sub> O <sub>2</sub> |

|               |                                                                                                                                                                                          |                   |                                |                                   |                  |     |      |    |     |    |                                                  |                                                |                                                     |
|---------------|------------------------------------------------------------------------------------------------------------------------------------------------------------------------------------------|-------------------|--------------------------------|-----------------------------------|------------------|-----|------|----|-----|----|--------------------------------------------------|------------------------------------------------|-----------------------------------------------------|
| [197]         | Discharge<br>Dismantling<br>Cathode Separation<br>Binder Dissolution (NMP)<br>Al Separation<br>Calcining (700 °C for 2 h)                                                                | LCO               | Calcined<br>Active<br>Material | Ascorbic Acid [R]                 | Glycine          | 0.5 | 0.02 | 80 | 360 | 2  | Co = 95%                                         | Low acid and<br>reductant<br>concentration     | Long process time<br>Very Low solid to liquid ratio |
| [208]         | Discharge<br>Dismantling<br>Cathode Separation<br>Binder Dissolution (NMP)<br>Al Separation                                                                                              | NMC<br>LCO        | Active<br>Material             | H <sub>2</sub> O <sub>2</sub> [R] | Tartaric<br>Acid | 2   | 1.71 | 70 | 30  | 17 | Co = 99%<br>Li = 99%<br>Ni = 99%<br>Mn = 99%     | High<br>efficiencies                           | Low solid to liquid ratio                           |
| [104,178,198] | Discharge (Na <sub>2</sub> SO <sub>4</sub><br>saturated)<br>Dismantling<br>Cathode Separation<br>Alkaline Leaching (2 M<br>NaOH 2 h)<br>Drying Calcining (700<br>°C for 5 h)<br>Grinding | NMC<br>LCO<br>LMO | Calcined<br>Active<br>Material | H <sub>2</sub> O <sub>2</sub> [R] | Citric<br>Acid   | 0.5 | 0.64 | 90 | 60  | 20 | Co =<br>100%<br>Li = 99%<br>Ni = 99%<br>Mn = 95% | Efficient for<br>various LIBs<br>type          | Low solid to liquid ratio                           |
| [90,199]      | Discharge<br>Dismantling<br>Cathode Separation<br>Binder Dissolution (NMP)<br>Drying Calcining (45 °C<br>for 1 h)<br>Grinding                                                            | LCO               | Calcined<br>Active<br>Material | Ascorbic Acid                     |                  |     | 1.25 | 70 | 20  | 25 | Co = 95%<br>Li =<br>98.5%                        | High<br>efficiencies<br>Two-in-one<br>chemical | Expensive acid<br>Low solid to liquid ratio         |
| [100]         | Discharge<br>Dismantling<br>Cathode Separation<br>Binder Dissolution (NMP)<br>Grinding<br>Calcining (700 °C for 2 h)                                                                     | LCO               | Calcined<br>Active<br>Material | Ascorbic Acid [R]                 | Maleic<br>Acid   | 0.1 | 0.02 | 80 | 360 | 2  | Co = 91%<br>Li = 99%                             | Low acid and<br>reductant<br>concentration     | Low solid to liquid ratio<br>Long reaction time     |

|       |                                                                                                                                                                         |     |                                |                                   |                |                  |      |    |     |    |                                               |                                                          |                                                     |
|-------|-------------------------------------------------------------------------------------------------------------------------------------------------------------------------|-----|--------------------------------|-----------------------------------|----------------|------------------|------|----|-----|----|-----------------------------------------------|----------------------------------------------------------|-----------------------------------------------------|
| [200] | Discharge<br>Dismantling<br>Plastic & Casing<br>Removal                                                                                                                 | NMC | Anode<br>and<br>Cathode        | Lemon Juice [R]                   |                | Pure Lemon Juice |      | 90 | 20  | 50 | Co = 94%<br>Li = 100%<br>Ni = 98%<br>Mn = 99% |                                                          |                                                     |
| [201] | Discharge<br>Dismantling<br>Binder Dissolution<br>(NMP)<br>Calcining (600 °C for 4<br>h)                                                                                | NMC | Calcined<br>Active<br>Material | H <sub>2</sub> O <sub>2</sub> [R] | Citric acid    | 1                | 5.12 | 60 | 40  | 80 | Weight<br>Leaching<br>= 99%                   | Relatively<br>High solid to<br>liquid ratio              | High concentration of H <sub>2</sub> O <sub>2</sub> |
| [189] | Discharge (Na <sub>2</sub> SO <sub>4</sub> sat)<br>Dismantling<br>Cathode Separation<br>Binder Dissolution<br>(NMP)<br>Drying Calcining (700<br>°C for 2 h)<br>Grinding | LCO | Calcined<br>Active<br>Material | H <sub>2</sub> O <sub>2</sub> [R] | Citric acid    | 2                | 0.88 | 70 | 80  | 50 | Co = 98%<br>Li = 99%                          | Low<br>concentration<br>of H <sub>2</sub> O <sub>2</sub> | Limited to LCO                                      |
| [189] | Discharge (Na <sub>2</sub> SO <sub>4</sub> sat)<br>Dismantling<br>Cathode Separation<br>Binder Dissolution<br>(NMP)<br>Drying Calcining (700<br>°C for 2 h)<br>Grinding | LCO | Calcined<br>Active<br>Material | Green Tea Waste [R]               | Citric<br>Acid | 1.5              | 0.59 | 90 | 120 | 30 | Co = 96%<br>Li = 98%                          | Reuse of a<br>waste                                      | Availability of tea waste<br>limited                |
| [190] | Discharge<br>Dismantling<br>Cathode Separation<br>Black Mass Stripping<br>Thermal (700 °C for 6 h)                                                                      | LCO | Calcined<br>Active<br>Material | H <sub>2</sub> O <sub>2</sub> [R] | Citric<br>Acid | 2                | 0.53 | 60 | 120 | 30 | Co = 81%<br>Li = 92%                          | Low<br>concentration<br>of H <sub>2</sub> O <sub>2</sub> | Low efficiencies                                    |
| [195] | Discharge<br>Dismantling<br>Cathode Separation                                                                                                                          | NMC | Black<br>Mass                  | H <sub>2</sub> O <sub>2</sub> [R] | Acetic<br>Acid | 3.5              | 1.71 | 60 | 60  | 40 | Co = 94%<br>Li = 100%<br>Ni = 96%<br>Mn = 93% | Inexpensive<br>acid                                      | Relatively low efficiencies                         |

|       |                                                                                                    |     |                                  |                                   |                                                    |                           |                       |      |     |                                       |                                                            |                                            |                                                       |
|-------|----------------------------------------------------------------------------------------------------|-----|----------------------------------|-----------------------------------|----------------------------------------------------|---------------------------|-----------------------|------|-----|---------------------------------------|------------------------------------------------------------|--------------------------------------------|-------------------------------------------------------|
| [193] | Discharge<br>Dismantling<br>Cathode Separation                                                     | NMC | Cathode                          | H <sub>2</sub> O <sub>2</sub> [R] | Formic<br>Acid                                     | 2                         | 6                     | 60   | 60  | 50                                    | Co = 37%<br>Li = 100%<br>Ni = 50%<br>Mn = 62%<br>Al = 4.5% | Simple<br>pretreatment                     | Low recovery rate                                     |
| [202] | Discharge (5% NaCl)<br>Dismantling<br>Cathode Separation<br>Binder Dissolution<br>(NMP)            | LCO | Active<br>Material               | Fe-PVC [R]                        | PVC<br>(HCl)                                       | 1:1 LCO:PVC               | Ratio LCO:Fe<br>= 1:2 | N.S. | 720 | Dry grinding<br>then water<br>washing | Co = 8.1%<br>Li = 100%                                     | Recycling of<br>another<br>plastic waste   | Long reaction time                                    |
| [203] | Discharge<br>Dismantling<br>Cathode Separation<br>Black Mass Stripping<br>Thermal (700 °C for 2 h) | LCO | Calcined<br>Active<br>Material   | Ascorbic Acid [R]                 | Citric<br>Acid                                     | 0.1                       | 0.02                  | 80   | 360 | 2                                     | Co = 80%<br>Li = 100%                                      | Low acid and<br>reductant<br>concentration | Long reaction time<br>Low solid to liquid ratio       |
| [77]  | Discharge<br>Dismantling                                                                           | LFP | Cathode                          | H <sub>2</sub> O <sub>2</sub> [O] | Acetic<br>Acid                                     | 0.8                       | 2.56                  | 50   | 30  | 120                                   | Li = 95%<br>Fe = 6%                                        | High solid to<br>liquid ratio              | Higher concentration of H <sub>2</sub> O <sub>2</sub> |
| [207] | Discharge<br>Dismantling<br>Binder dissolution<br>(NMP)<br>Calcining (400 °C)<br>Grinding          | LFP | Calcined<br>Active<br>Material   | None                              | Oxalic<br>Acid                                     | 0.3                       | N.A.                  | 80   | 60  | 60                                    | Li = 98%<br>Fe = 92%                                       | No oxidizing<br>agent                      | Low value Fe product                                  |
| [141] | Crushing<br>Magnetic Separation<br>Sieving                                                         | LCO | Fine,<br>Non-<br>mag<br>Material | None                              | Oxalic<br>Acid                                     | 3                         | N.A.                  | 80   | 120 | 50                                    | Co =<br>0.25%<br>Li = 100%                                 | Simple<br>pretreatment                     | Low recovery rate                                     |
| [204] | Manual<br>Dismantling/Separation                                                                   | LFP | Cathode                          | None                              | Citric<br>Acid;<br>Mechano-<br>Chemical<br>Process | 20 g Citric<br>Acid/g LFP | N.A.                  | N.S. | 480 | 50                                    | Li =<br>97.8%<br>Fe =<br>95.6%                             | No oxidizing<br>agent                      | Long reaction time                                    |



**Table S10.** Summary of purification and extraction processes in organic acid solutions; here, LCO, NMC, and DADMAC are lithium-cobalt oxide, lithium-nickel-manganese-cobalt oxide, and diallyldimethylammonium chloride; N.A. stands for “Not Applicable”; N.S. stands for “Not Specified”.

| Reference | Purification Process (Reagents)                                                                                                                                                                                                       | Final Product(s)                                                                                                             | Recovery Rate (%)                      | Comments                                                 |
|-----------|---------------------------------------------------------------------------------------------------------------------------------------------------------------------------------------------------------------------------------------|------------------------------------------------------------------------------------------------------------------------------|----------------------------------------|----------------------------------------------------------|
| [191]     | Co Precipitation (NaOH)<br>Li Precipitation (NaF)                                                                                                                                                                                     | LiF(aq)<br>Co(OH) <sub>2</sub>                                                                                               | Co = 100%<br>Li = 100%                 |                                                          |
| [104]     | Sol-gel NMC Precipitation                                                                                                                                                                                                             | NMC(s)                                                                                                                       | N.S.                                   | 150 mAh/g at 0.2 C; 94% retention after 160 cycles 0.2 C |
| [200]     | Co Precipitation (H <sub>2</sub> C <sub>2</sub> O <sub>4</sub> )<br>Mn Precipitation (Na <sub>2</sub> CO <sub>3</sub> )<br>Ni Precipitation (Na <sub>2</sub> CO <sub>3</sub> )<br>Li Precipitation (Na <sub>2</sub> CO <sub>3</sub> ) | CoC <sub>2</sub> O <sub>4</sub> (s)<br>MnCO <sub>3</sub> (s)<br>NiCO <sub>3</sub> (s)<br>Li <sub>2</sub> CO <sub>3</sub> (s) | N.S.                                   |                                                          |
| [201]     | NMC Sol-gel                                                                                                                                                                                                                           | NMC(s)                                                                                                                       | N.S.                                   | 147 mAh/g at 0.1 C; 93% retention after 50 cycles        |
| [189]     | Co Precipitation (H <sub>2</sub> C <sub>2</sub> O <sub>4</sub> )<br>Li Precipitation (Na <sub>2</sub> CO <sub>3</sub> )                                                                                                               | CoC <sub>2</sub> O <sub>4</sub> (s)<br>Li <sub>2</sub> CO <sub>3</sub> (s)                                                   | Co = 99%<br>Li = 93%                   |                                                          |
| [202]     | Co/Fe Calcination                                                                                                                                                                                                                     | CoFe <sub>4</sub> O <sub>6</sub> (s)                                                                                         | Co = 92%<br>Li = 100%                  |                                                          |
| [77]      | Al Foil Recovery<br>Li Solution Evaporation<br>Fe Impurities Precipitation (NaOH)<br>Li Precipitation (Na <sub>2</sub> CO <sub>3</sub> )<br>Carbothermal Reduction (Glucose Ethanol)                                                  | Al(s)<br>Fe(OH) <sub>3</sub> (s)<br>Spent CH <sub>3</sub> COONa(aq)<br>LFP-C(s)                                              | Al = 99.5%<br>Fe = 99.1%<br>Li = 84.8% |                                                          |
| [207]     | FeC <sub>2</sub> O <sub>4</sub> (s) Calcining<br>Li Extraction (Ionic Sieve)<br>Ca <sub>3</sub> (PO <sub>4</sub> ) <sub>2</sub> Precipitation (Ca(OH) <sub>2</sub> )                                                                  | FeO; Fe <sub>2</sub> O <sub>3</sub> (s)<br>Li(aq)<br>Spent Water<br>Ca <sub>3</sub> (PO <sub>4</sub> ) <sub>2</sub> (s)      | N.S.                                   |                                                          |
| [205]     | Hydrothermal Precipitation (NH <sub>4</sub> OH, Urea, DADMAC)<br>Co Calcination<br>Sintering (Li <sub>2</sub> CO <sub>3</sub> )                                                                                                       | LCO<br>Spent Na Solution                                                                                                     | 100%                                   | 140 mAh/g at 0.1 C<br>123 mAh/g at 1 C                   |

|       |                                                                                               |                                                                                                       |             |  |
|-------|-----------------------------------------------------------------------------------------------|-------------------------------------------------------------------------------------------------------|-------------|--|
| [204] | Evaporation<br>Fe precipitation (NaOH)<br>Li Precipitation (Na <sub>2</sub> CO <sub>3</sub> ) | Fe(OH) <sub>3</sub> (s)<br>Li <sub>2</sub> CO <sub>3</sub> (s)<br>Spent Solution Na Citrate/Phosphate | Li = 89.95% |  |
|-------|-----------------------------------------------------------------------------------------------|-------------------------------------------------------------------------------------------------------|-------------|--|

**Table S11.** Summary of direct recycling processes; here, LCO, NMC, NCO, LFP, NMP, DMAC, DMC, EC, MIBC, and CMC are for lithium-cobalt oxide, lithium-nickel-manganese-cobalt oxide, lithium-nickel-cobalt oxide, lithium-iron-phosphate, n-methyl-2-pyrrolidone, dimethylacetamide, dimethylene carbonate, ethylene carbonate, methylisobutylcarbinol, and carboxymethyl cellulose; N.A. stands for “Not Applicable”; N.S. stands for “Not Specified”.

| Reference | Treated Battery Type(s) | Process Schemes                                                                                   | T (°C)/Other parameters                 | Final Product(s)                | Re-evaluated Capacity (mAh/g)                             |
|-----------|-------------------------|---------------------------------------------------------------------------------------------------|-----------------------------------------|---------------------------------|-----------------------------------------------------------|
| [89]      | NMC                     | Discharging<br>Dismantling<br>Alkali leaching (NaOH)<br>Heating                                   | 600 °C (5 h)                            | NMC Zinc O <sub>2</sub> Battery | N.A.                                                      |
| [209]     | Any LIBs                | Ultrasound Treatment                                                                              | [900; 2000] kHz (0.12–0.5 h)            | Active Material                 | N.S.                                                      |
| [212]     | NCA                     | Dismantling<br>Cathode Separation<br>Cleaning (0.5–10 g/L NH <sub>3</sub> + Alcohol)<br>Calcining | 30 °C (0.3 – 1 h)<br>600–700 °C (2–7 h) | NCA                             | 99% of pristine material capacity;<br>191 mAh/g at 0.15 C |

|       |          |                                                                                                                                                      |                                    |                 |                                                                                                                               |
|-------|----------|------------------------------------------------------------------------------------------------------------------------------------------------------|------------------------------------|-----------------|-------------------------------------------------------------------------------------------------------------------------------|
| [58]  | Any LIBs | Dismantling<br>Cathode Separation<br>Solvent Washing<br>Milling<br>Sieving<br>Autoclave (LiOH)<br>Sintering<br>Cooling (CO <sub>2</sub> )            | 250 – 900 °C<br>(7–12 h)           | Active Material | N.S.                                                                                                                          |
| [108] | Any LIBs | Dismantling<br>Cathode Separation<br>Binder Dissolution (NMP)<br>Flotation (Limonene +<br>Torpineol)<br>Calcining (Li <sub>2</sub> CO <sub>3</sub> ) | 850 °C (12 h)                      | LCO             | 95% retention after 50<br>cycles                                                                                              |
| [219] | LCO      | Discharging<br>Dismantling<br>Cathode Separation<br>Al Foil Recovery<br>Electrochemical<br>Dissolution/Deposition<br>(LiOH + KOH)                    | 40–100 °C; 1<br>mA/cm <sup>2</sup> | LCO             | Reactions proposed<br>are wrong. Not<br>oxidative but<br>reductive<br>135 mAh/g at 0.2 C;<br>96% retention after 50<br>cycles |
| [220] | LCO      | Discharging<br>Dismantling<br>Cathode Separation                                                                                                     |                                    | LCO             | 126.7 mAh/g at 0.2 C;<br>97.2 % retention after<br>50 cycles                                                                  |

|          |                      |                                                                                                                                                          |                                                |                   |                                                                                           |
|----------|----------------------|----------------------------------------------------------------------------------------------------------------------------------------------------------|------------------------------------------------|-------------------|-------------------------------------------------------------------------------------------|
|          |                      | Al Foil Recovery<br>Electrochemical Pulsating<br>(LiOH)                                                                                                  | 50 kV SS<br>Anode (0.5 h)                      |                   |                                                                                           |
| [60,214] | Lithium Oxide        | Crushing<br>Sieving<br>C Flotation<br>Calcining (LiOH)                                                                                                   | 500–800 °C (1<br>h)                            | LCO<br>NCO<br>NMC | 135 mAh/g at 0.1 C<br>(LCO)<br>170 mAh/g at 0.1 C<br>(NCO)<br>175 mAh/g at 0.1 C<br>(NMC) |
| [216]    | LCO                  | Dismantling<br>Cathode Separation<br>Washing (DMC)<br>Binder Dissolution (NMP)<br>Hydrothermal (LiOH +<br>Li <sub>2</sub> SO <sub>4</sub> )<br>Annealing | 50 min<br>220 °C (4 h)<br>800 °C (4 h)         | LCO               | 150 mAh/g at 0.1 C<br>93% retention after<br>100 cycles                                   |
| [107]    | LCO<br>or other LIBs | Dismantling<br>Harvesting Active Material<br>Al and Cu Leaching (NH <sub>4</sub> OH<br>+ LiOH+O <sub>2</sub> )<br>Drying                                 | 5 M NH <sub>4</sub> OH –<br>1 M LiOH (12<br>h) | Active Material   | N.S.                                                                                      |
| [224]    | LFP                  | Discharge<br>Dismantling<br>Components Separation                                                                                                        | Manual<br>Manual                               | LFP-C             | 148 mAh/g at 0.1 C<br>126 mAh/g at 1 C                                                    |

|       |     |                                                                                                                                                                                                                                                                 |                                                                             |       |                                                                                 |
|-------|-----|-----------------------------------------------------------------------------------------------------------------------------------------------------------------------------------------------------------------------------------------------------------------|-----------------------------------------------------------------------------|-------|---------------------------------------------------------------------------------|
|       |     | Cathode Heat Treatment (N <sub>2</sub> )<br>Al Foil Removal (H <sub>2</sub> O)<br>Milling (FeC <sub>2</sub> O <sub>4</sub> ·2H <sub>2</sub> O,<br>Li <sub>2</sub> CO <sub>3</sub> , (NH <sub>4</sub> )HPO <sub>4</sub> )<br>Thermal Treatment (N <sub>2</sub> ) | 550 °C<br><br>Ultrasound<br>Vacuum<br>700 °C                                |       | 99% retention at 1 C<br>after 50 cycles                                         |
| [116] | LFP | Discharge<br>Dismantling<br>Components Separation<br>Alkaline Leaching (NaOH)<br>Binder Dissolution (NMP)<br>Relithiation (LiOH)<br>Annealing (N <sub>2</sub> )                                                                                                 | Manual<br>Manual<br>5 M NaOH<br><br>180 °C/0.5 M<br>LiOH<br>350 °C + 650 °C | LFP-C | 130 mAh/g (charge<br>rate not available)<br>99.6% retention after<br>100 cycles |
| [98]  | LFP | Discharge<br>Dismantling<br>Components Separation<br>Binder Dissolution (DMAC)<br>Doped Annealing (N <sub>2</sub> + Fresh<br>LFP)                                                                                                                               | Manual<br>Manual<br>30 °C/S:L =<br>1:10<br>700 °C/Doping<br>Ratio (1:9)     | LFP-C | Approximately 144<br>mAh/g at 0.1 C<br>130 mAh/g at 1 C                         |
| [217] | LFP | Discharge<br>Dismantling<br>Components Separation<br>Black Mass Scraping                                                                                                                                                                                        | 0.5 V<br>Manual<br>Manual<br>Manual                                         | LFP-C | Approximately 150<br>mAh/g (charge rate<br>not specified)                       |

|          |     |                                                                                                                                                                                                     |                                                   |       |                                                                               |
|----------|-----|-----------------------------------------------------------------------------------------------------------------------------------------------------------------------------------------------------|---------------------------------------------------|-------|-------------------------------------------------------------------------------|
|          |     | Chemical Lithiation (LiI in Acetonitrile)<br>Drying/Grinding                                                                                                                                        | 1 M LiI                                           |       |                                                                               |
| [58]     | LFP | Dismantling<br>Component Separation<br>Black Mass Harvesting<br>Chemical Lithiation (LiI in EC:DEC))<br>Annealing                                                                                   | 1 M LiI<br>N/S                                    | LFP-C | N.S.                                                                          |
| [97,213] | LFP | Discharge<br>Dismantling<br>Alkaline Wash (NaOH)<br>Components Separation<br>Cathode Alkaline Wash (NaOH)<br>Grinding Sieving<br>Annealing (H <sub>2</sub> + Ar + Li <sub>2</sub> CO <sub>3</sub> ) | 2 V<br><br>pH = 10–11<br>Mechanical<br><br>650 °C | LFP-C | 147 mAh/g at 0.2 C<br>132 at 1 C<br>95.3% retention after 100 cycles at 0.2 C |
| [69]     | LFP | Dismantling<br>Components Separation<br>Thermal Treatment (N <sub>2</sub> )<br>Al Separation<br>Grinding/Sieving                                                                                    | Manual<br>Manual<br>500 °C                        | LFP-C | 136 mAh/g at 0.1 C                                                            |
| [225]    | LFP | Discharge<br>Dismantling                                                                                                                                                                            | 0.5 V<br>Manual                                   | LFP-C | 150 mAh/g at 0.1 C<br>145 mAh/g at 1 C                                        |

|       |     |                                                                                                                                                                  |                                                                                           |                                       |                                                                                                                              |
|-------|-----|------------------------------------------------------------------------------------------------------------------------------------------------------------------|-------------------------------------------------------------------------------------------|---------------------------------------|------------------------------------------------------------------------------------------------------------------------------|
|       |     | Binder Dissolution (DMC)<br>Drying<br>Components Separation<br>Crushing/Sieving<br>Annealing (N <sub>2</sub> )                                                   | 95 °C<br><br><br>200 °C + 700 °C                                                          |                                       | 147.3 mAh/g at C/3<br>95% retention after<br>100 cycles at C/3                                                               |
| [226] | NMC | Opening<br>Electrolyte Washing (DMC)<br>Binder Dissolution (NMP)<br>Manual Sorting<br>Relithiation (LiNO <sub>3</sub> + LiOH)<br>NMC Sintering (O <sub>2</sub> ) | Sonication<br><br>Molten Salt<br>300 °C; 2–4 h<br>850 °C for 4 h                          | NMC (523)                             | 150 mAh/g at 0.1 C<br>149.3 mAh/g at 1 C<br>136 mAh/g after 100<br>cycles at 1 C<br>90% retention after<br>100 cycles at 1 C |
| [227] | LFP | Discharge (NaCl 5%)<br>Crushing<br>Drying<br>Pyrolysis (N <sub>2</sub> )<br>Crushing<br>2 Stage Screening<br>Fines C Flotation (Kerosene,<br>MIBC, CMC)          | 120 °C<br>550 °C (2 h)<br><br>1 mm; 0.25<br>mm<br>1 Rougher; 2<br>Cleaner; 3<br>Scavenger | LFP<br>Carbon<br>Cu-Al<br>Electrolyte | 128 mAh/g at 0.2 C<br>126 mAh/g at 0.2 C<br>after 100 cycles<br>98.6% retention                                              |

|       |     |                                                                                                                                             |                                                                                  |                          |      |
|-------|-----|---------------------------------------------------------------------------------------------------------------------------------------------|----------------------------------------------------------------------------------|--------------------------|------|
| [228] | LFP | Discharge-Perforation<br>Automatic Dismantling<br>Thermal Treatment<br>Crushing<br>Sieving<br>Eddy Current Separator<br>Pneumatic Separator | 300 °C (2 h)<br>4 mm; 0.2 mm<br>Repulsed = Al<br>and Cu<br>O/F = Al; U/F =<br>Cu | LFP + Carbon<br>Al<br>Cu | N.A. |
|-------|-----|---------------------------------------------------------------------------------------------------------------------------------------------|----------------------------------------------------------------------------------|--------------------------|------|

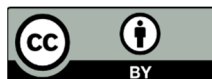

© 2020 by the authors. Submitted for possible open access publication under the terms and conditions of the Creative Commons Attribution (CC BY) license (<http://creativecommons.org/licenses/by/4.0/>).
